# Supplementary material for: Microbiota and Metabolite Profiling Reveal Specific Alterations in Bacterial Community Structure and Environment in the Cystic Fibrosis Airway during Exacerbation
Source: PLOS journal article supplement (doi:10.1371/journal.pone.0082432), 2013-12-17

|                             |                                                                                                                                                                                                                                                                                                                                                                         |
|-----------------------------|-------------------------------------------------------------------------------------------------------------------------------------------------------------------------------------------------------------------------------------------------------------------------------------------------------------------------------------------------------------------------|
| Title                       | Microbiota and metabolite profiling reveal specific alterations in bacterial community structure and environment in the cystic fibrosis airway during exacerbation                                                                                                                                                                                                      |
| Authors                     | Twomey, Kate B.;Alston, Mark;An, Shi-Qi;O'Connell, Oisin J.;McCarthy, Yvonne;Swarbreck, David;Febrer, Melanie;Dow, J. Maxwell;Plant, Barry J.;Ryan, Robert P.                                                                                                                                                                                                           |
| Publication date            | 2013                                                                                                                                                                                                                                                                                                                                                                    |
| Original Citation           | Twomey KB, Alston M, An S-Q, O'Connell OJ, McCarthy Y, Swarbreck D, et al. (2013) Microbiota and Metabolite Profiling Reveal Specific Alterations in Bacterial Community Structure and Environment in the Cystic Fibrosis Airway during Exacerbation. PLoS ONE 8(12): e82432. doi:10.1371/journal.pone.0082432                                                          |
| Type of publication         | Article (peer-reviewed)                                                                                                                                                                                                                                                                                                                                                 |
| Link to publisher's version | 10.1371/journal.pone.0082432                                                                                                                                                                                                                                                                                                                                            |
| Rights                      | © 2015 Twomey et al. This is an open access article distributed under the terms of the Creative Commons Attribution License, which permits unrestricted use, distribution, and reproduction in any medium, provided the original author and source are credited - <a href="http://creativecommons.org/licenses/by/4.0/">http://creativecommons.org/licenses/by/4.0/</a> |
| Download date               | 2024-09-22 01:42:43                                                                                                                                                                                                                                                                                                                                                     |
| Item downloaded from        | <a href="https://hdl.handle.net/10468/2348">https://hdl.handle.net/10468/2348</a>                                                                                                                                                                                                                                                                                       |

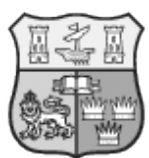

# UCC

**University College Cork, Ireland**  
Coláiste na hOllscoile Corcaigh



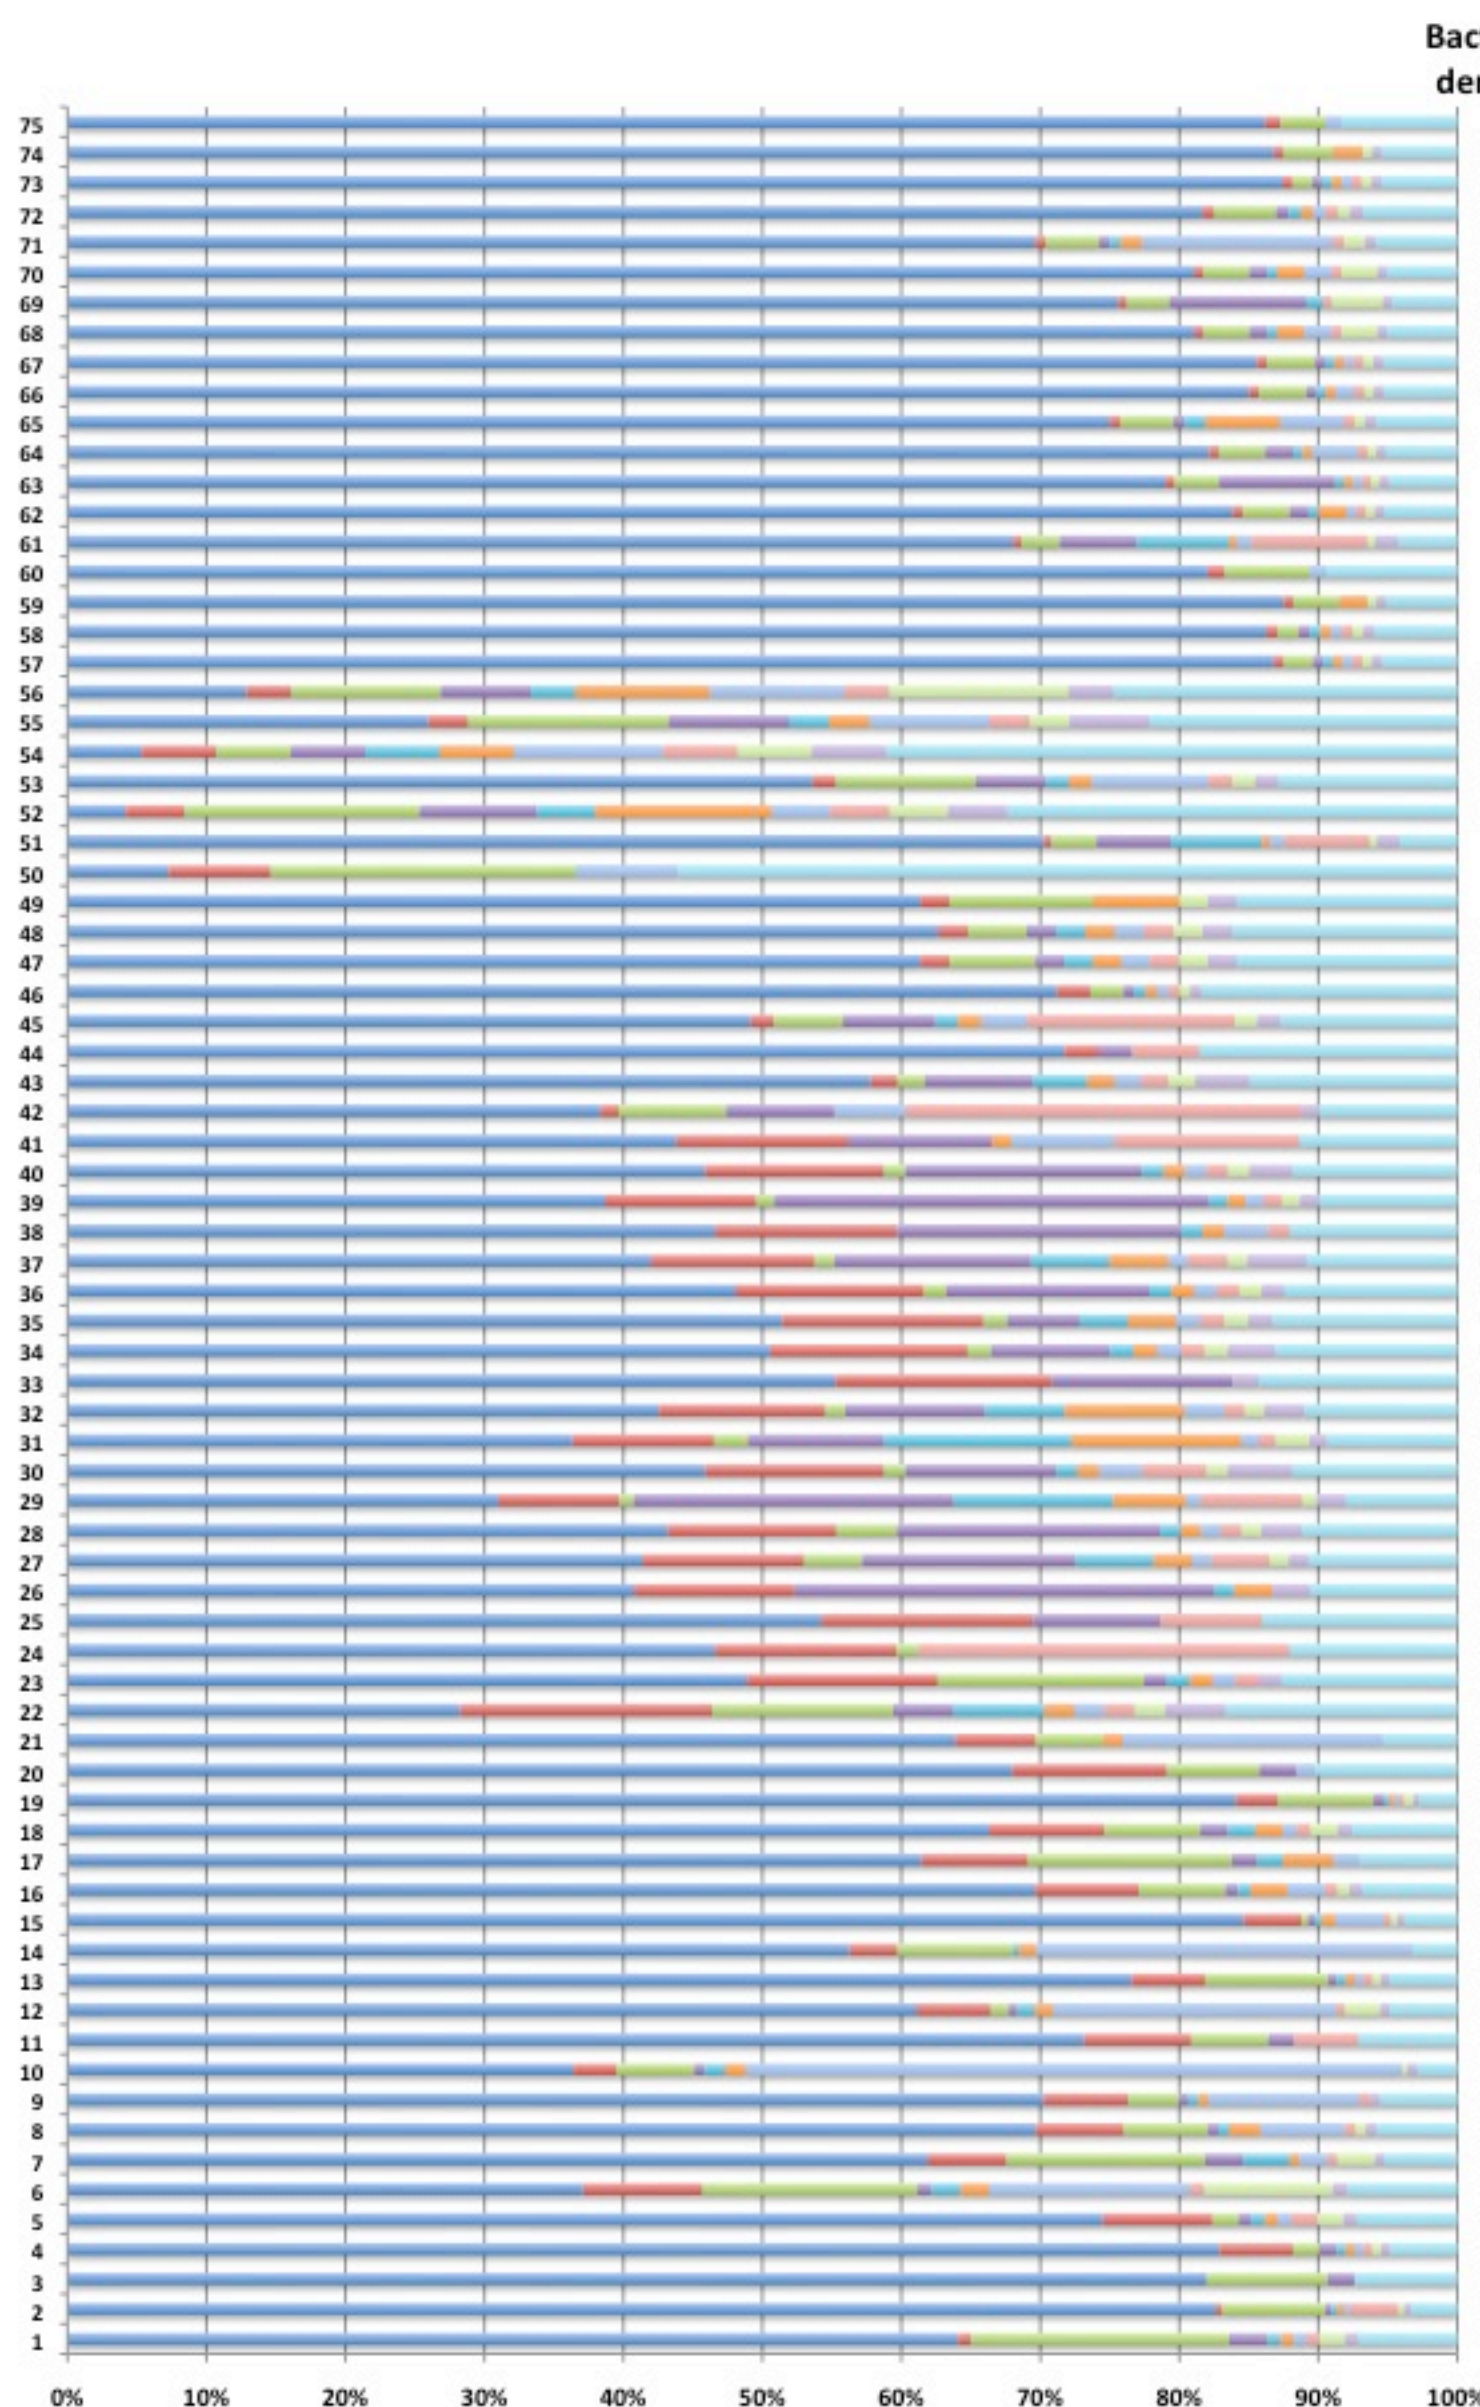

% Relative abundance of OTUs from DNA

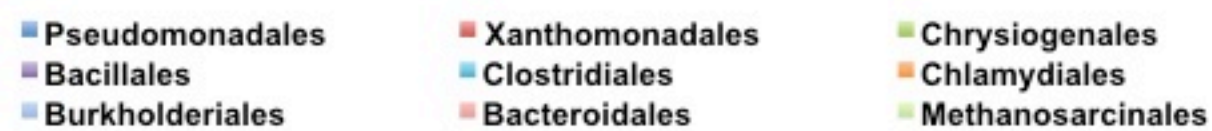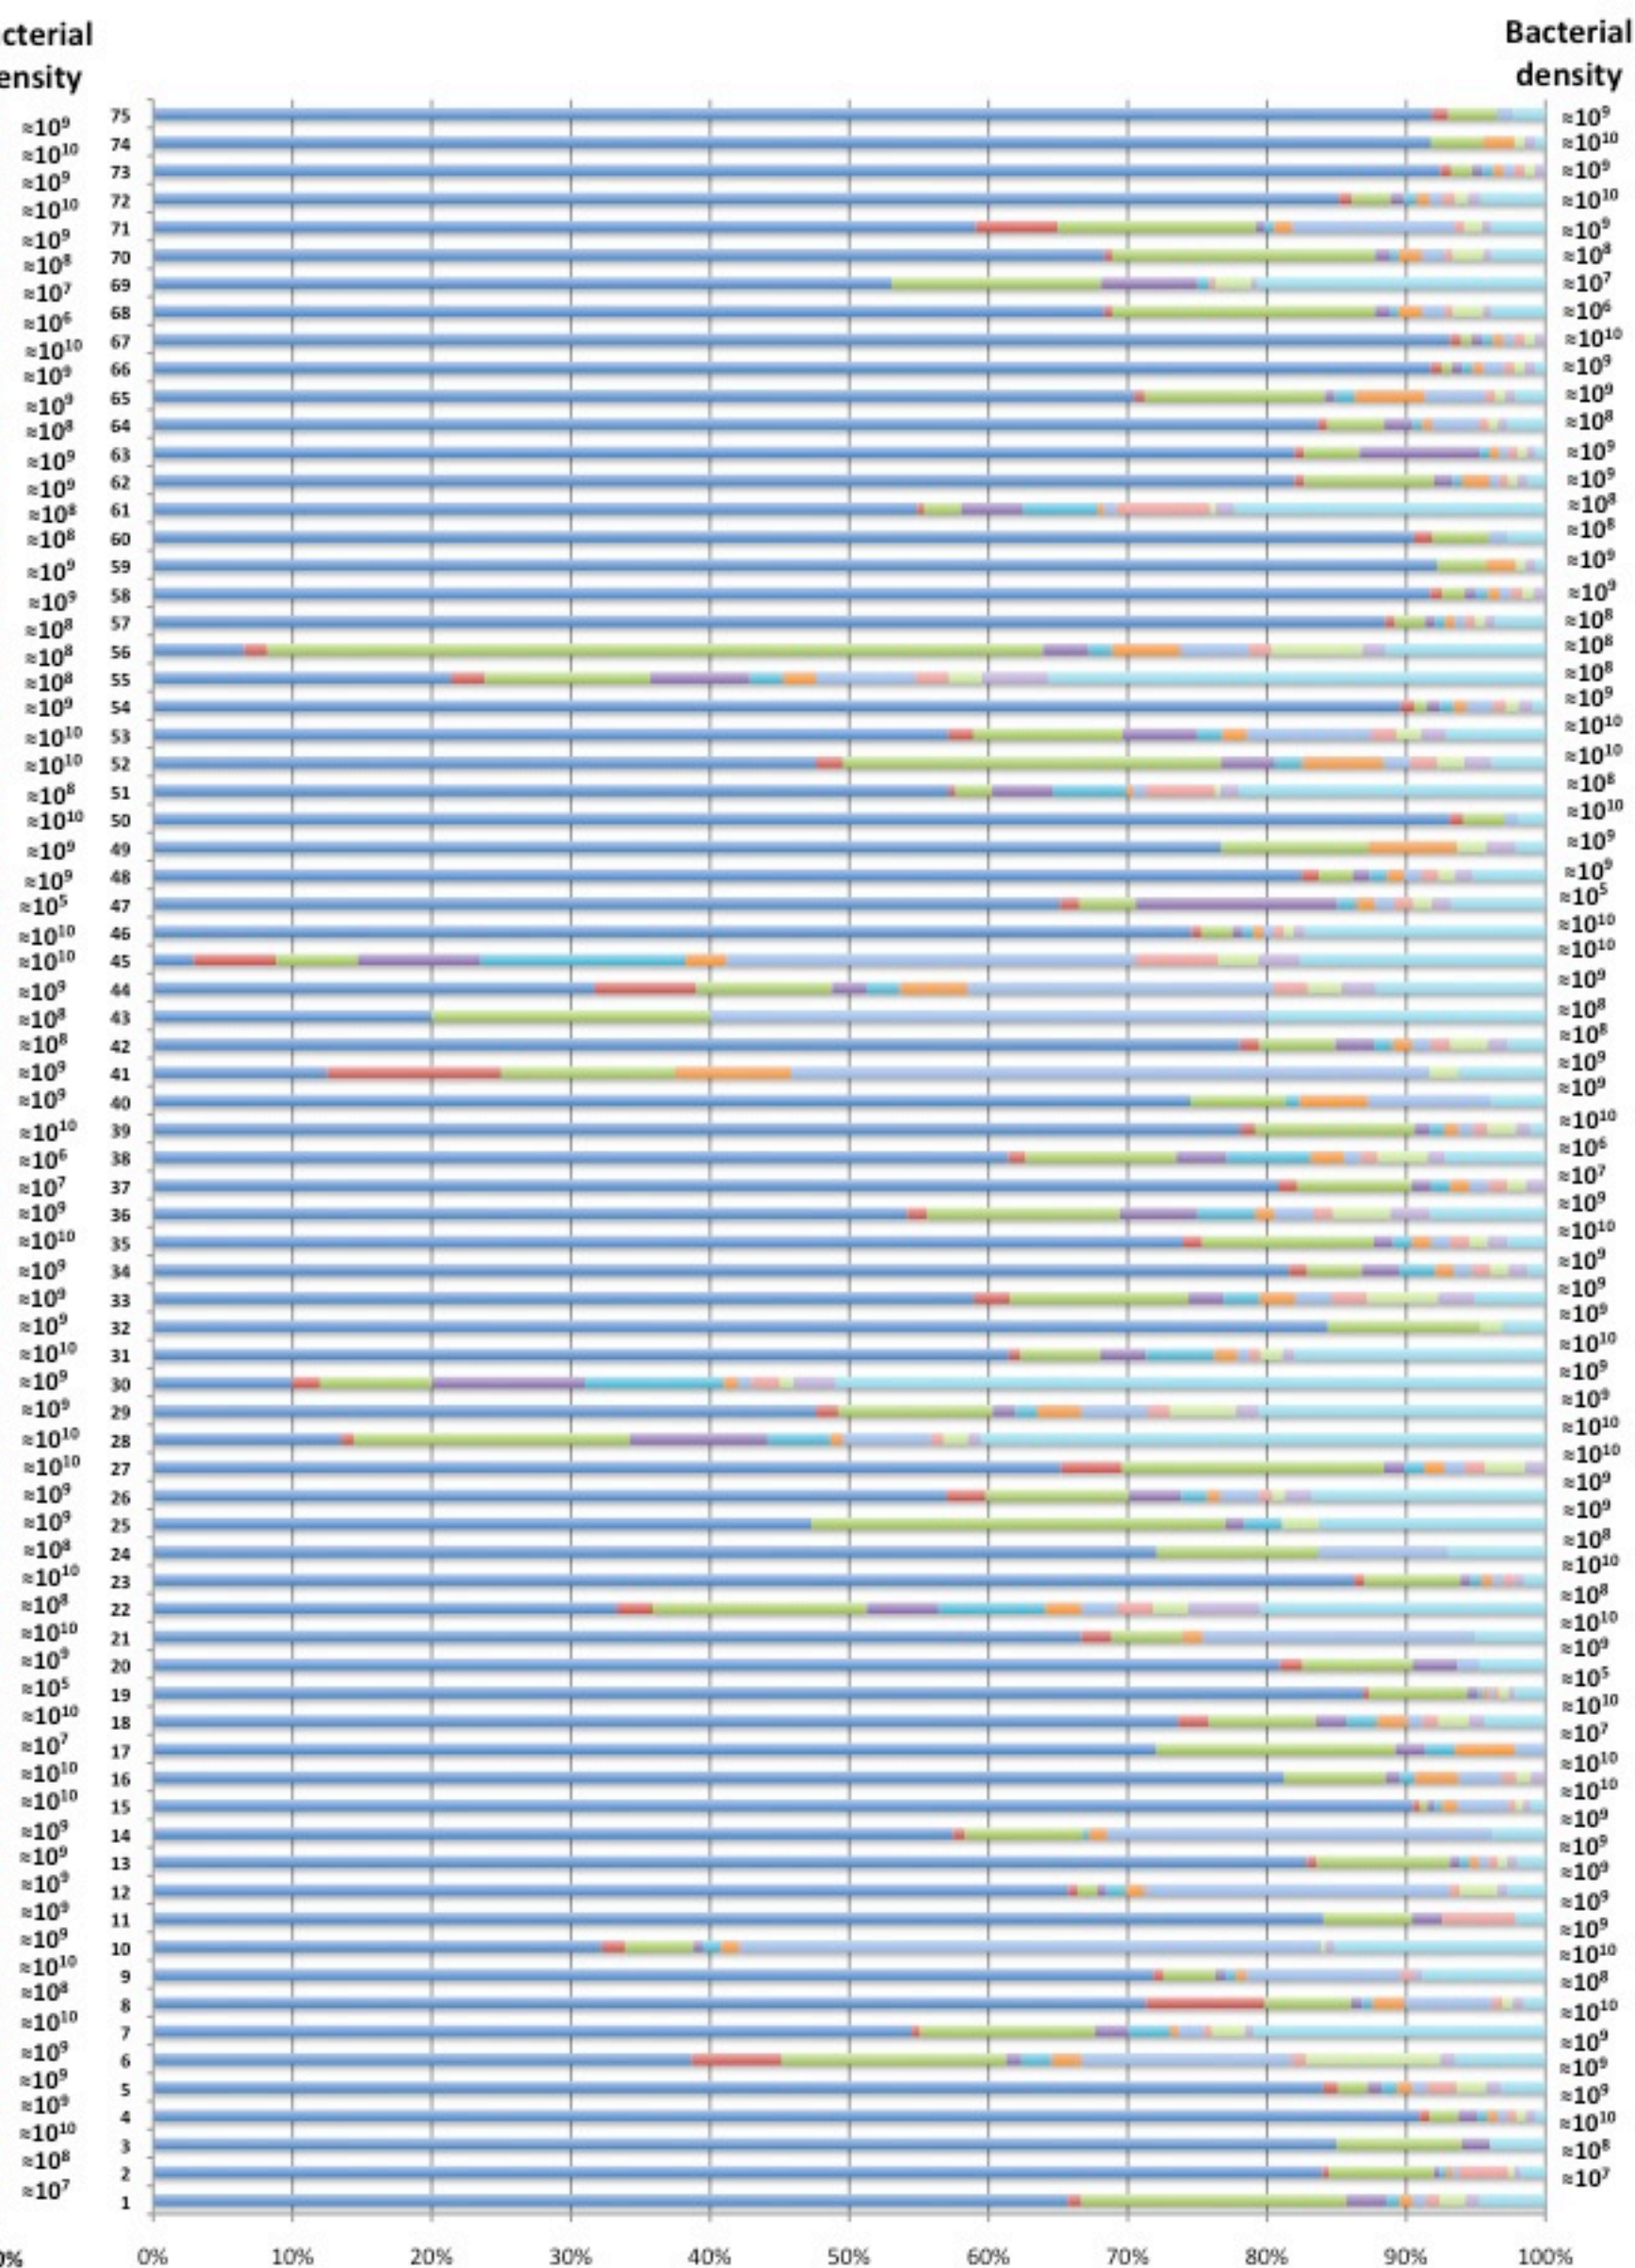

% Relative abundance of OTUs from RNA

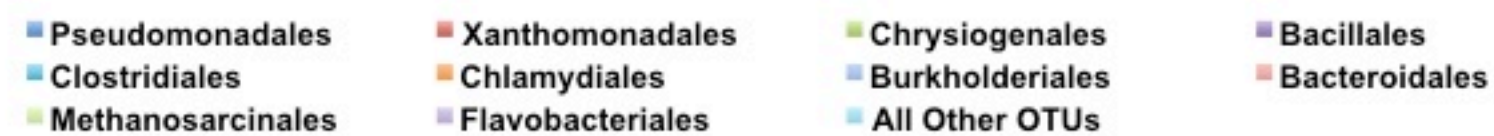

Supplement: S1 (10.1371/journal.pone.0082432.s001) [file journal.pone.0082432.s001.PDF]
