# Supplementary material for: Microbiota and Metabolite Profiling Reveal Specific Alterations in Bacterial Community Structure and Environment in the Cystic Fibrosis Airway during Exacerbation
Source: PLOS journal article supplement (doi:10.1371/journal.pone.0082432), 2013-12-17

**UCC Library and UCC researchers have made this item openly available.  
Please [let us know](#) how this has helped you. Thanks!**

|                                    |                                                                                                                                                                                                                                                                                                                                                                          |
|------------------------------------|--------------------------------------------------------------------------------------------------------------------------------------------------------------------------------------------------------------------------------------------------------------------------------------------------------------------------------------------------------------------------|
| <b>Title</b>                       | Microbiota and metabolite profiling reveal specific alterations in bacterial community structure and environment in the cystic fibrosis airway during exacerbation                                                                                                                                                                                                       |
| <b>Author(s)</b>                   | Twomey, Kate B.; Alston, Mark; An, Shi-Qi; O'Connell, Oisín J.; McCarthy, Yvonne; Swarbreck, David; Febrer, Melanie; Dow, J. Maxwell; Plant, Barry J.; Ryan, Robert P.                                                                                                                                                                                                   |
| <b>Publication date</b>            | 2013                                                                                                                                                                                                                                                                                                                                                                     |
| <b>Original citation</b>           | Twomey KB, Alston M, An S-Q, O'Connell OJ, McCarthy Y, Swarbreck D, et al. (2013) Microbiota and Metabolite Profiling Reveal Specific Alterations in Bacterial Community Structure and Environment in the Cystic Fibrosis Airway during Exacerbation. PLoS ONE 8(12): e82432. doi:10.1371/journal.pone.0082432                                                           |
| <b>Type of publication</b>         | Article (peer-reviewed)                                                                                                                                                                                                                                                                                                                                                  |
| <b>Link to publisher's version</b> | <a href="http://dx.doi.org/10.1371/journal.pone.0082432">http://dx.doi.org/10.1371/journal.pone.0082432</a><br>Access to the full text of the published version may require a subscription.                                                                                                                                                                              |
| <b>Rights</b>                      | © 2015 Twomey et al. This is an open access article distributed under the terms of the Creative Commons Attribution License, which permits unrestricted use, distribution, and reproduction in any medium, provided the original author and source are credited<br><a href="http://creativecommons.org/licenses/by/4.0/">http://creativecommons.org/licenses/by/4.0/</a> |
| <b>Item downloaded from</b>        | <a href="http://hdl.handle.net/10468/2348">http://hdl.handle.net/10468/2348</a>                                                                                                                                                                                                                                                                                          |

Downloaded on 2021-05-12T02:35:54Z

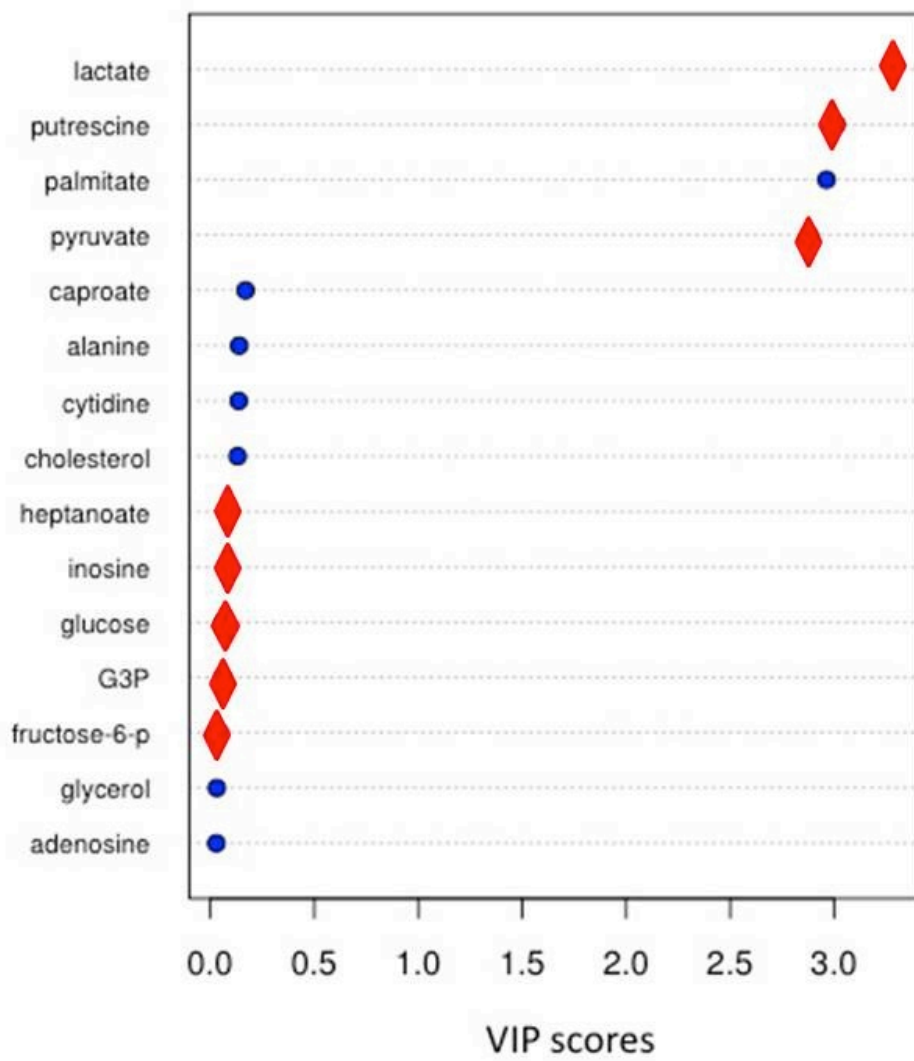

Supplement: S5 (10.1371/journal.pone.0082432.s005) [file journal.pone.0082432.s005.PDF]
