# Supplementary material for: Microbiota and Metabolite Profiling Reveal Specific Alterations in Bacterial Community Structure and Environment in the Cystic Fibrosis Airway during Exacerbation
Source: PubMed Central journal article supplement (PMC3866110; doi:10.1371/journal.pone.0082432), 2013-12-17
Supplement: pone.0082432.s003.pdf [file pone.0082432.s003.pdf]

A.

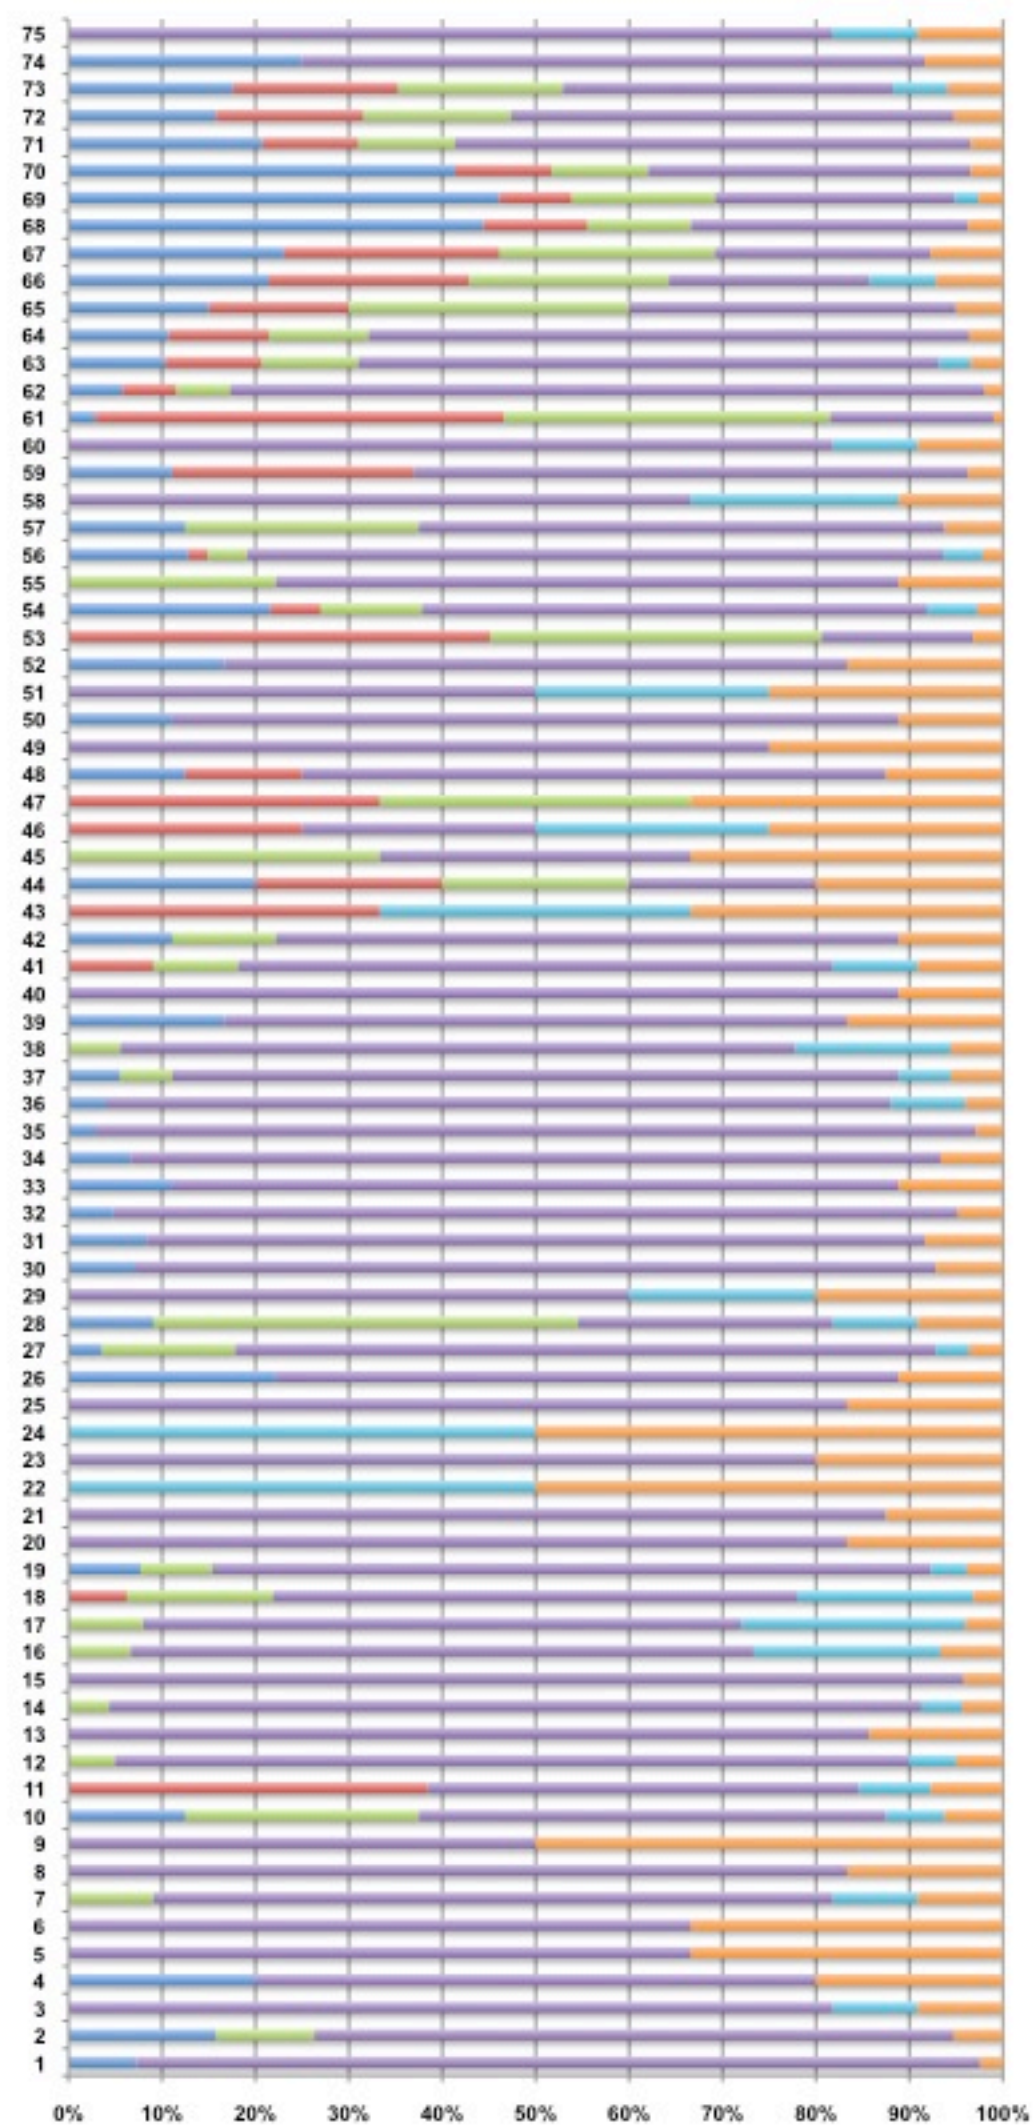

% Relative abundance of OTUs from DNA

■ Methanosarcinales ■ Bacteroidales ■ Clostridiales  
 ■ Chrysiogenales ■ Actinomyindales ■ Bifidobacterium

B.

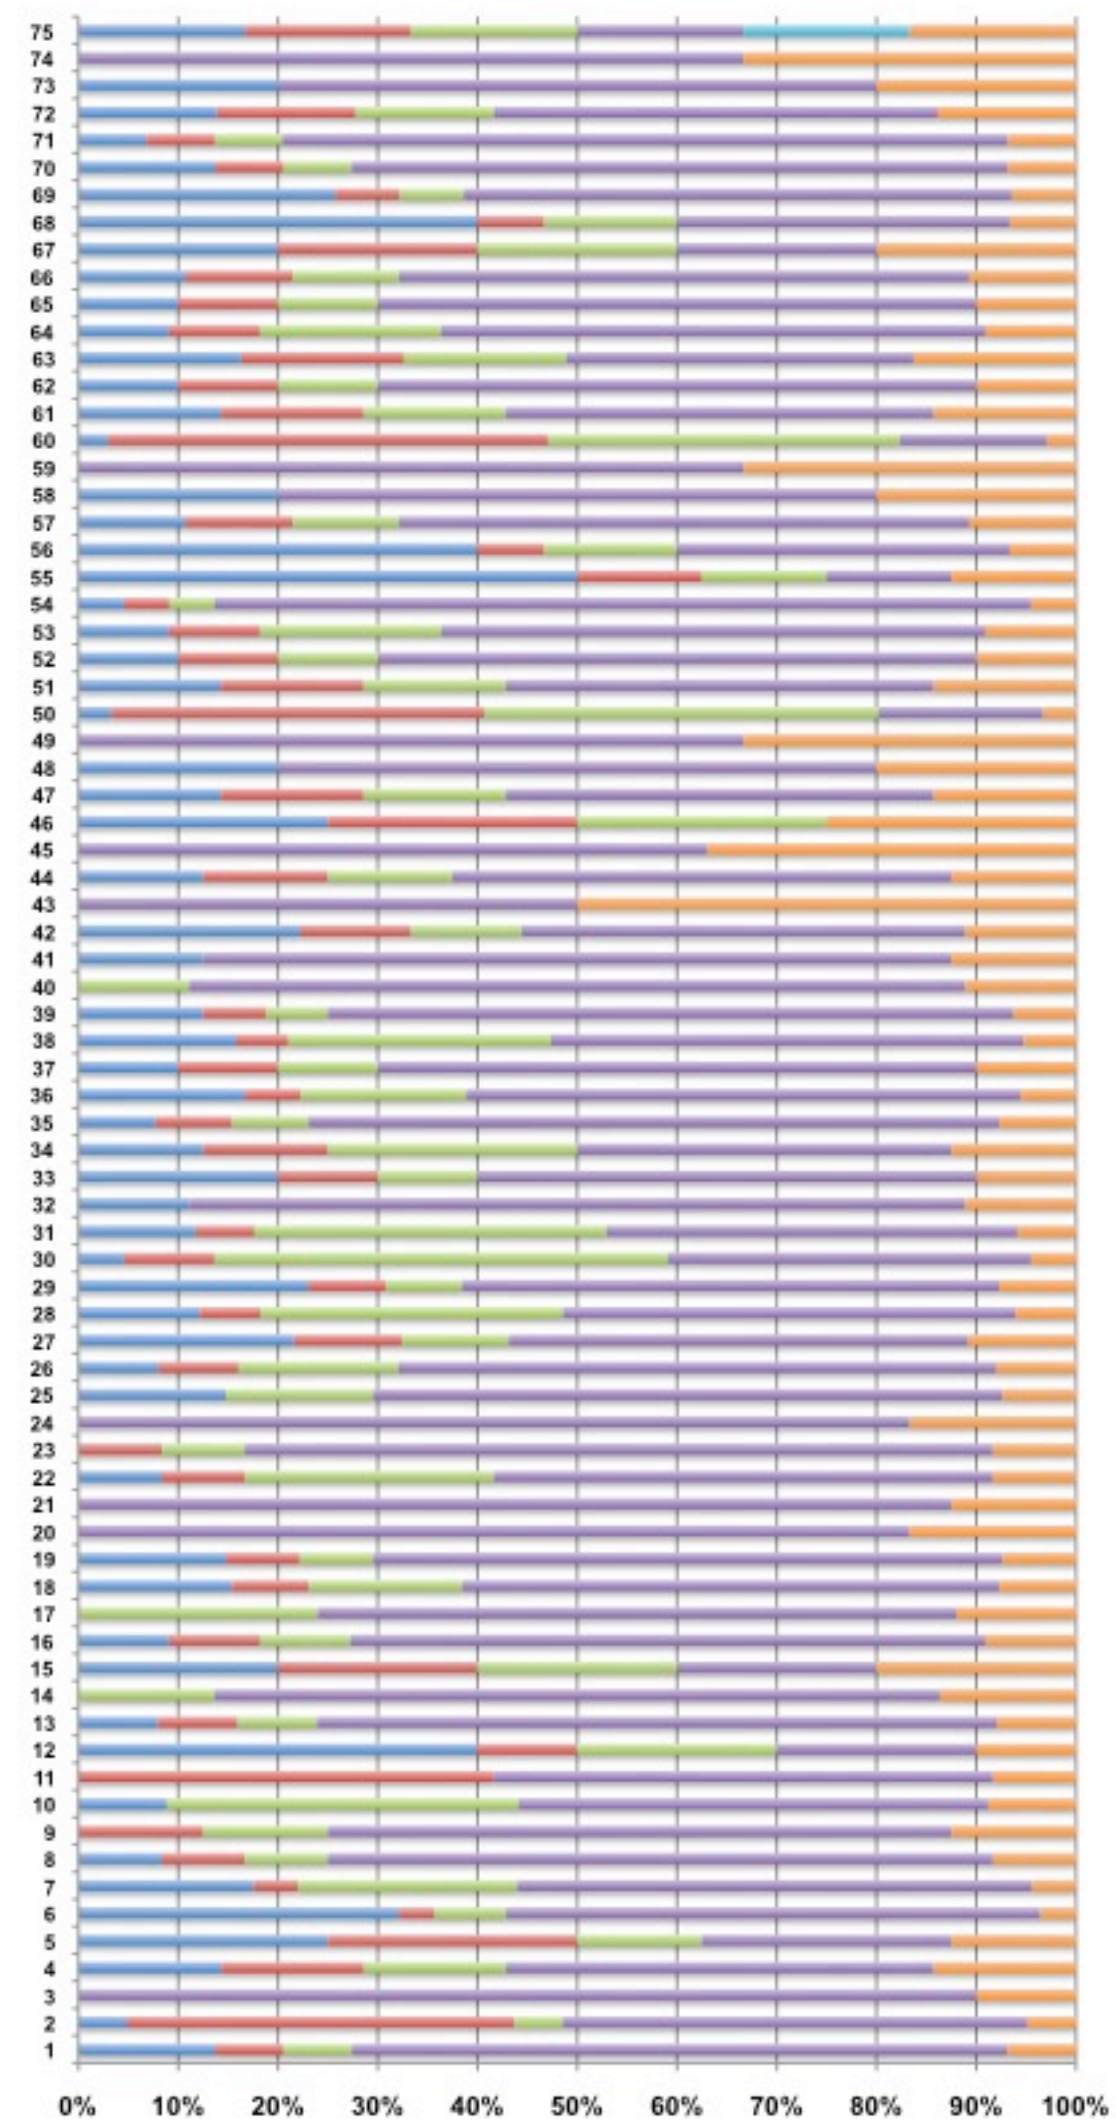

% Relative abundance of OTUs from RNA

■ Methanosarcinales ■ Bacteroidales ■ Clostridiales  
 ■ Chrysiogenales ■ Actinomyindales ■ Bifidobacterium
