# Supplementary material for: Microbiota and Metabolite Profiling Reveal Specific Alterations in Bacterial Community Structure and Environment in the Cystic Fibrosis Airway during Exacerbation
Source: PubMed Central journal article supplement (PMC3866110; doi:10.1371/journal.pone.0082432), 2013-12-17

**A.**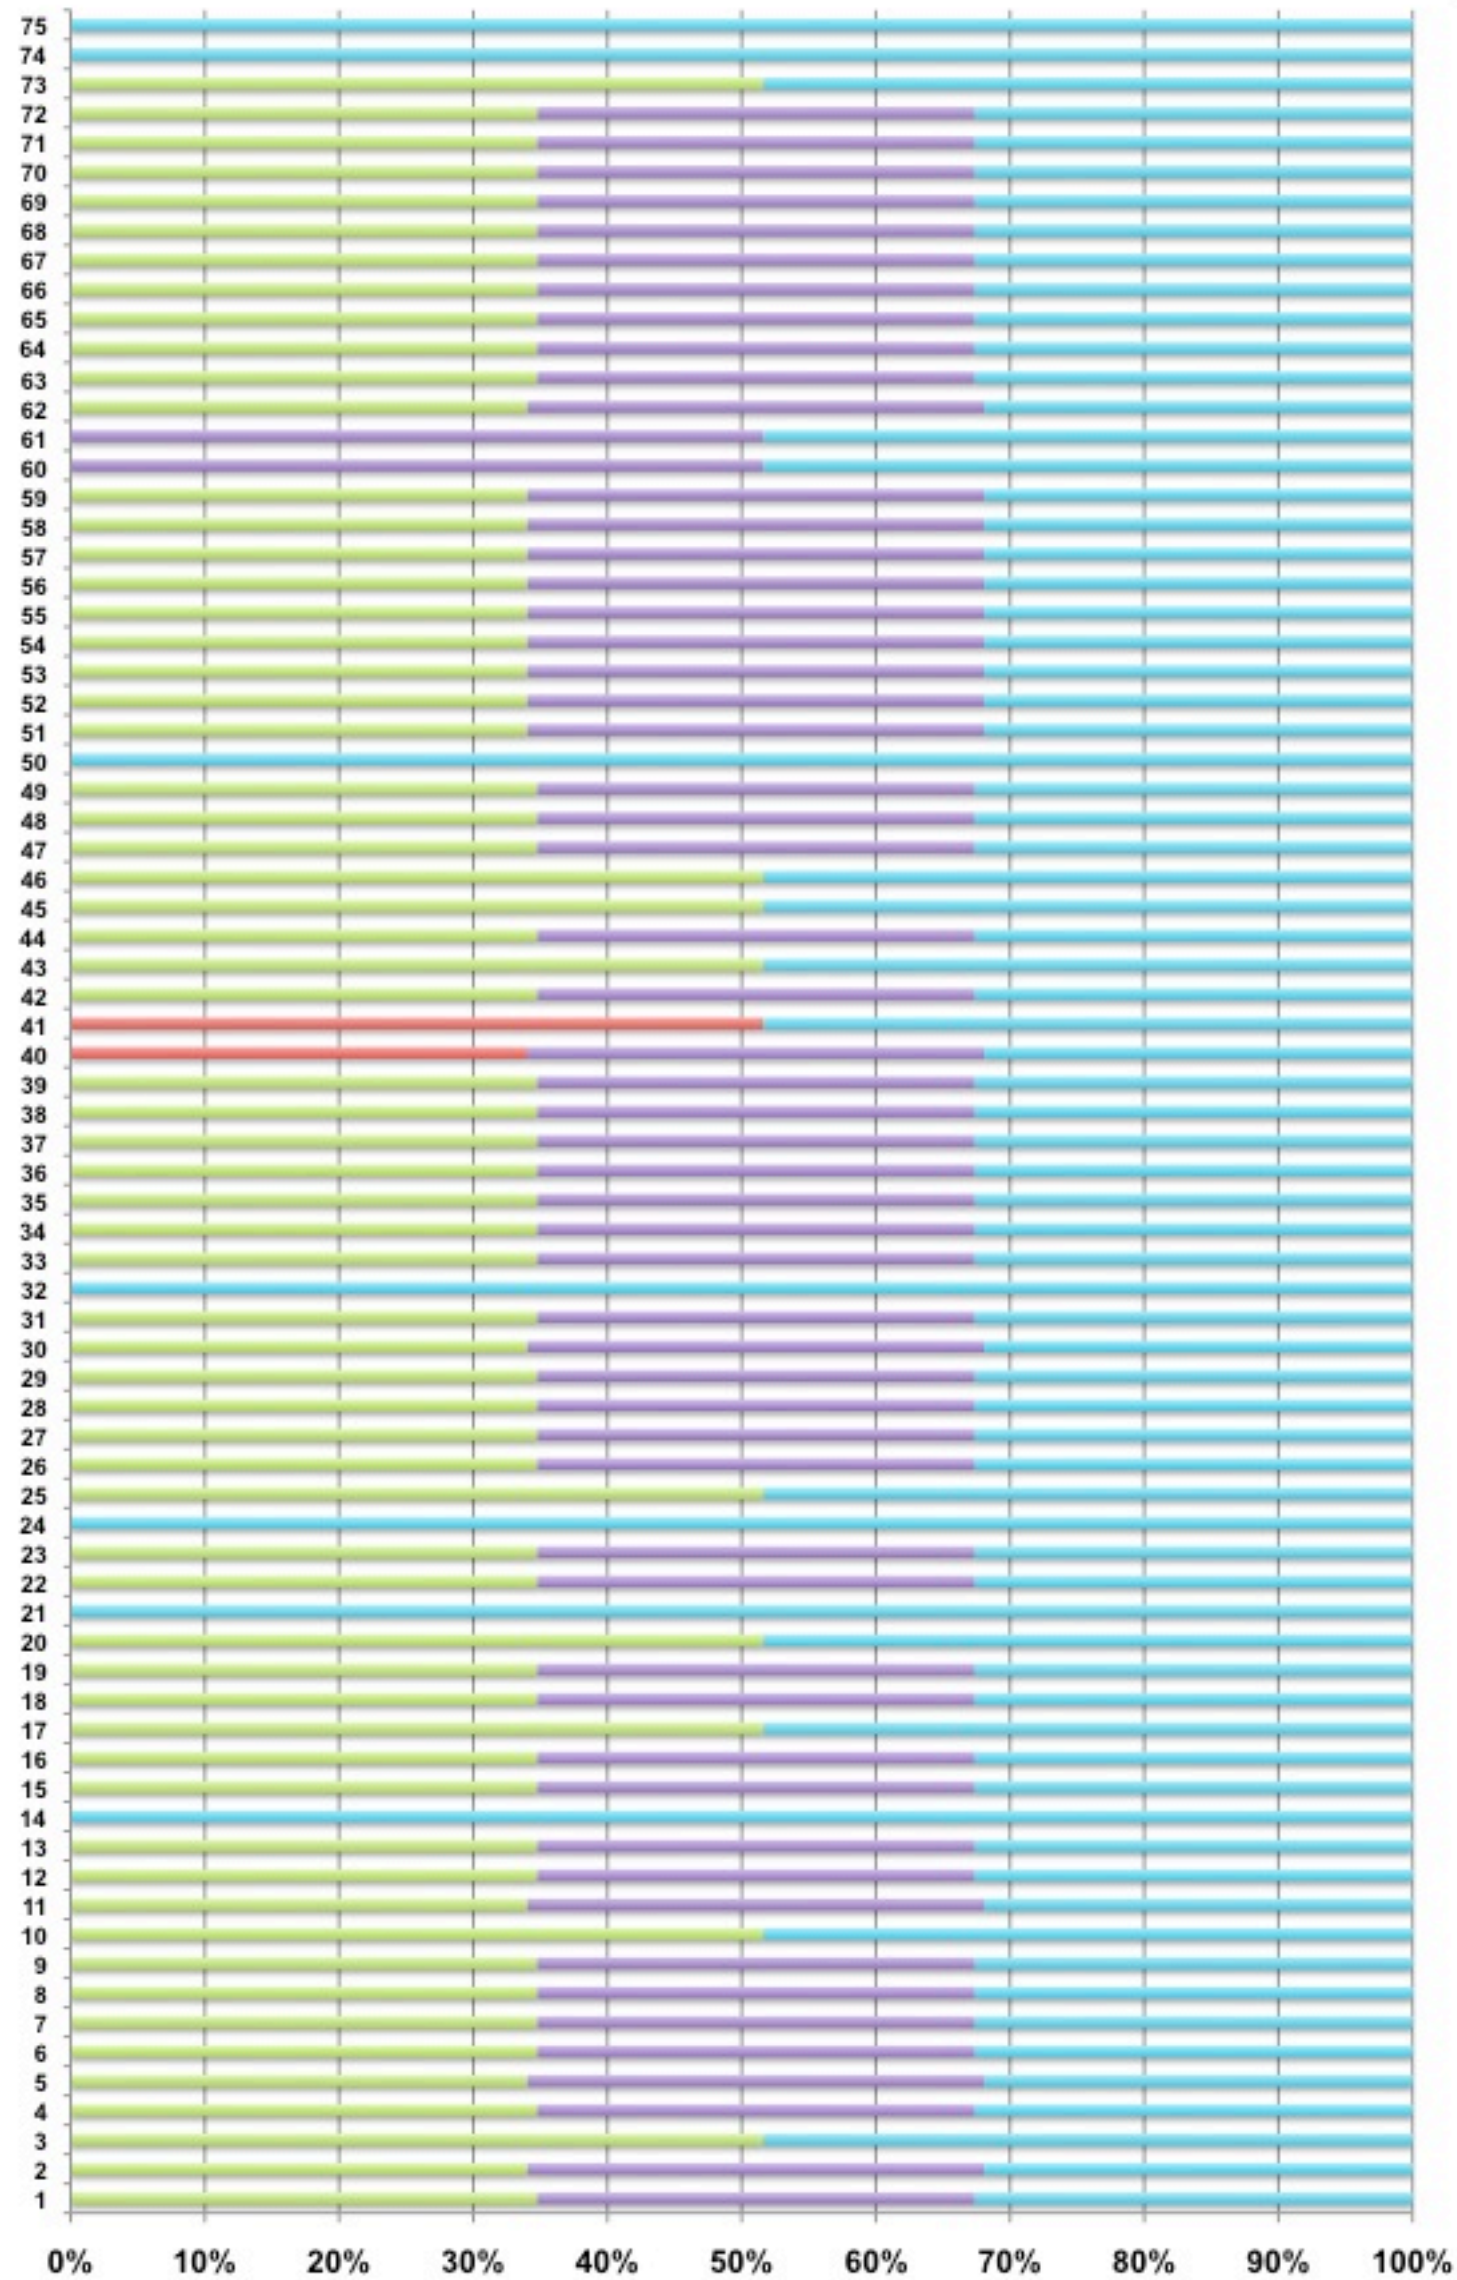

% Relative abundance of OTUs from DNA

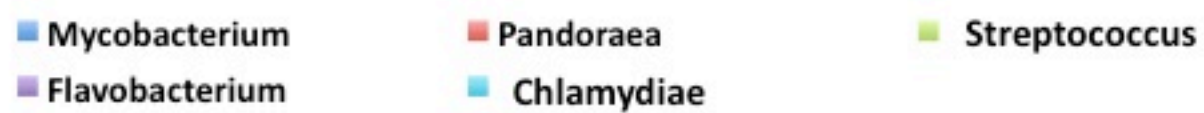**B.**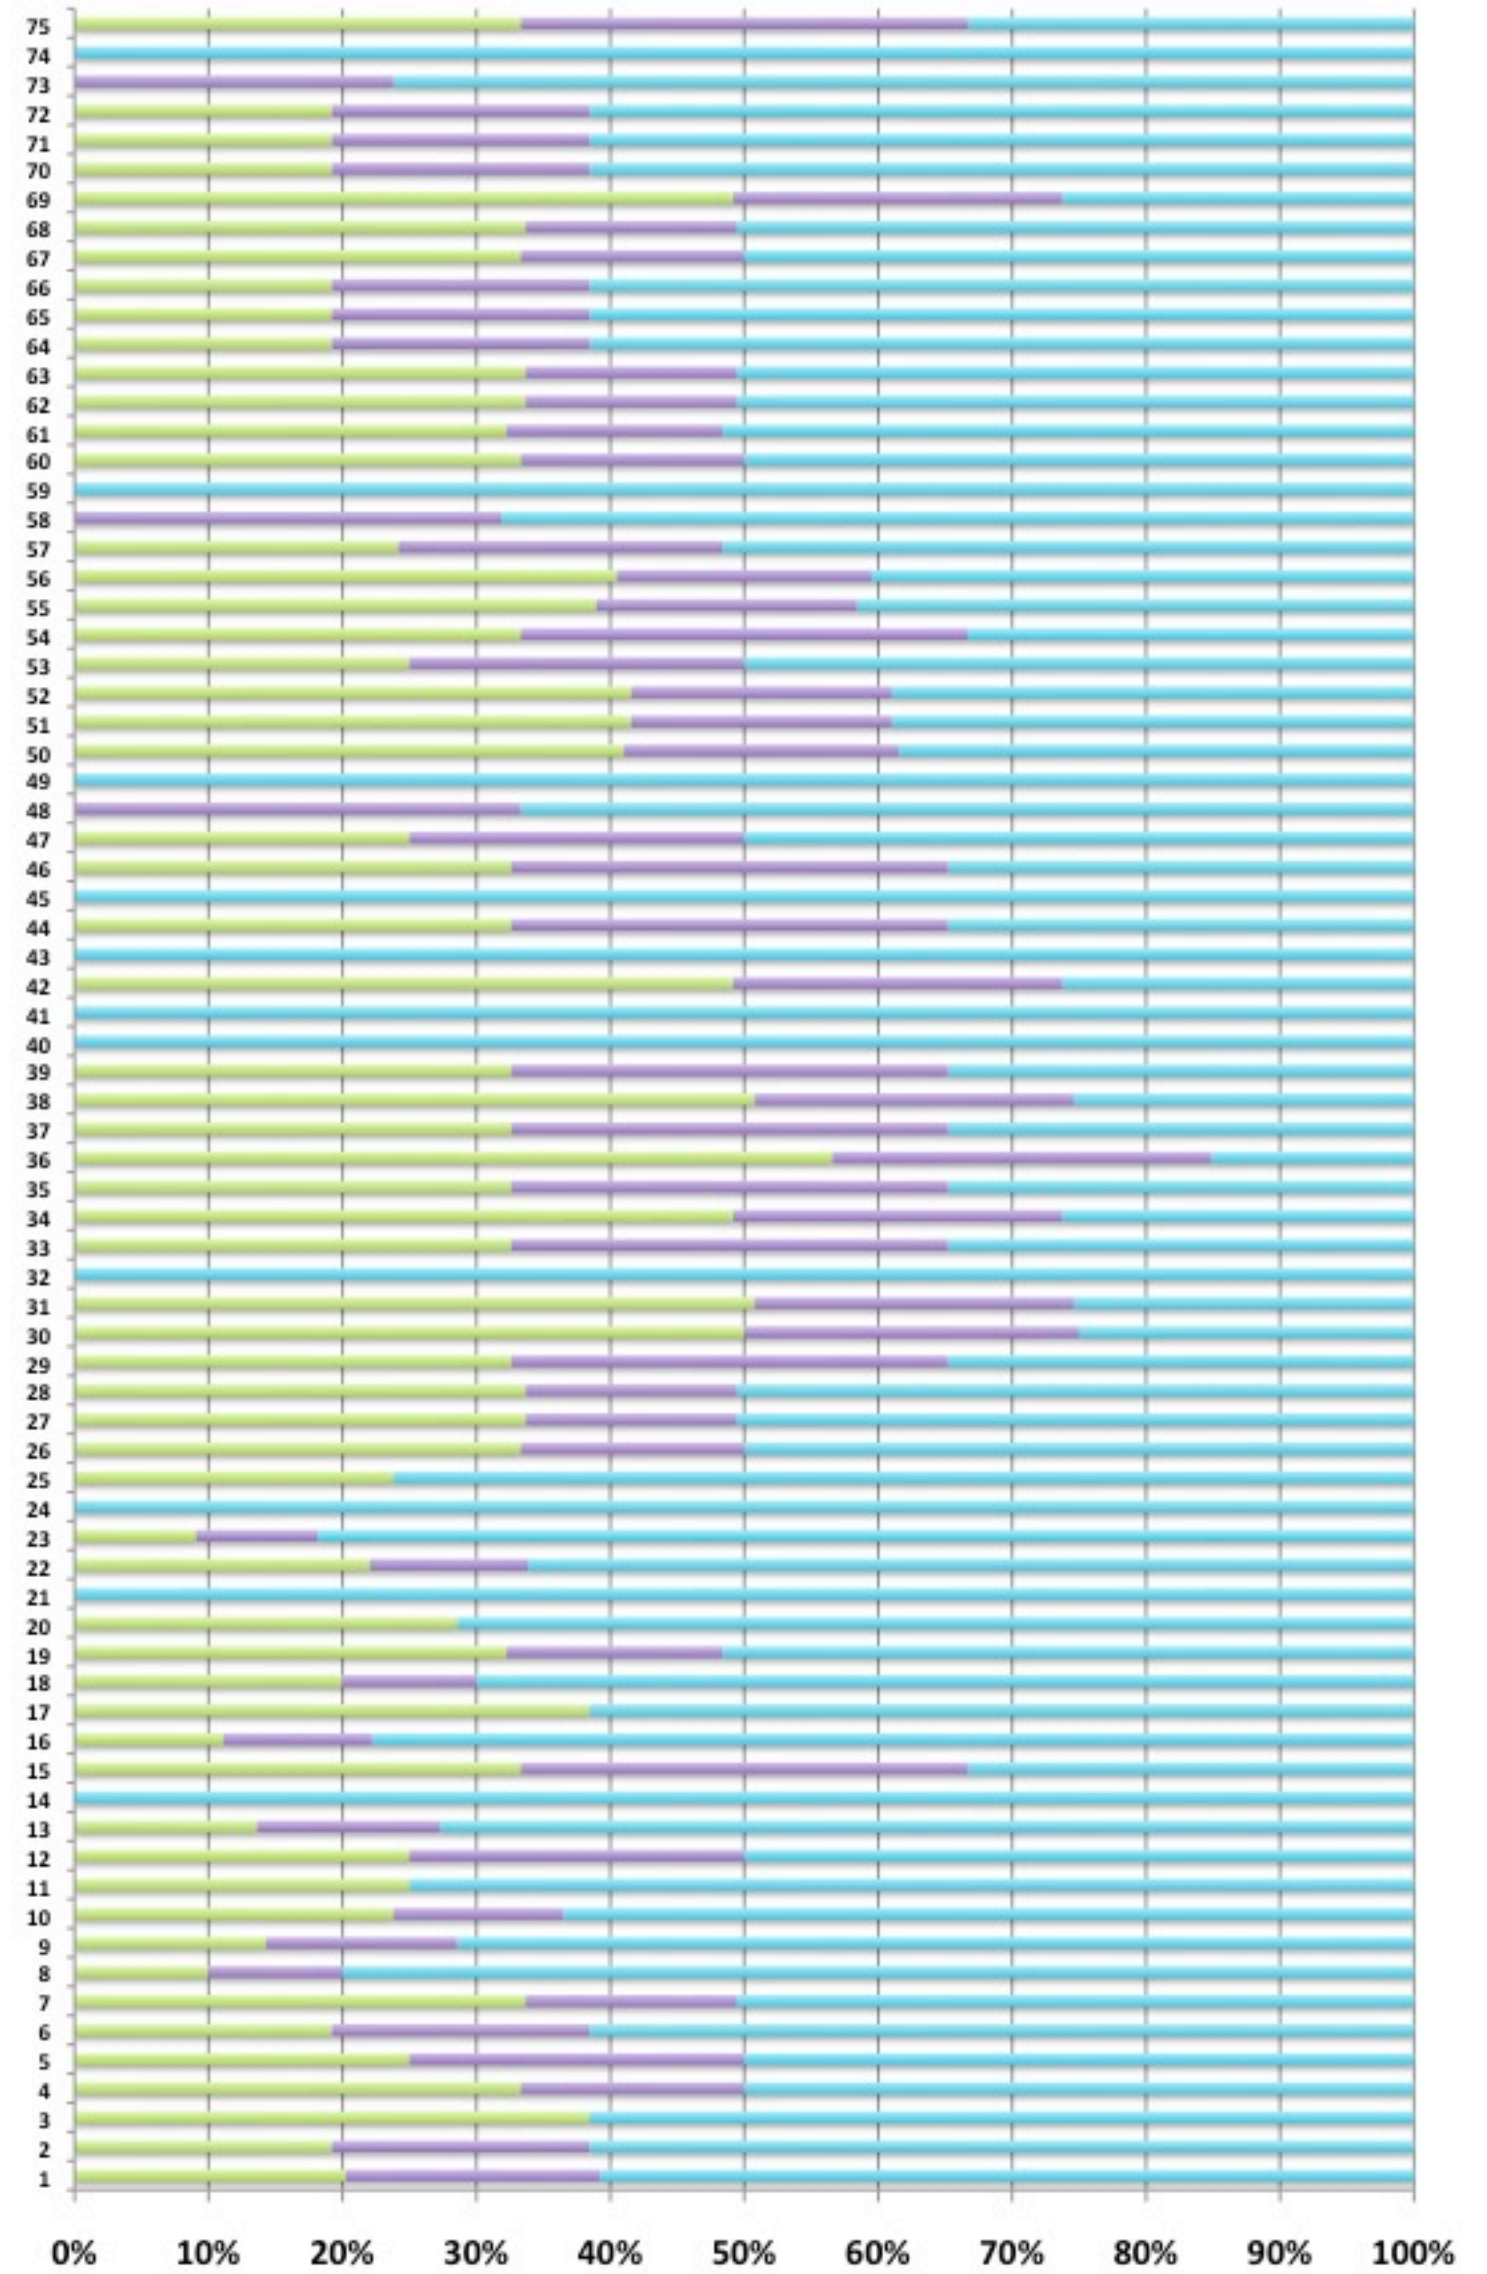

% Relative abundance of OTUs from RNA

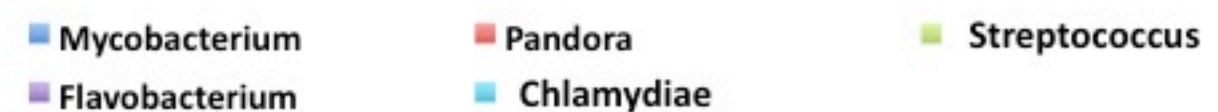

Supplement: pone.0082432.s004.pdf [file pone.0082432.s004.pdf]
