# Supplementary material for: Microbiota and Metabolite Profiling Reveal Specific Alterations in Bacterial Community Structure and Environment in the Cystic Fibrosis Airway during Exacerbation
Source: PubMed Central journal article supplement (PMC3866110; doi:10.1371/journal.pone.0082432), 2013-12-17
Supplement: pone.0082432.s006.pdf [file pone.0082432.s006.pdf]

**Table S1. Clinical data and treatment from CF and non-CF patients included in the study.**

| Patient no. | Age (year) | Sex | Clinical data patients           |                  |                               | Treatment       |
|-------------|------------|-----|----------------------------------|------------------|-------------------------------|-----------------|
|             |            |     | Known CFTR mutation <sup>a</sup> | BMI <sup>b</sup> | FEV <sub>1</sub> <sup>c</sup> | AZ <sup>d</sup> |
| 1           | 20         | F   | ΔF508                            | -                | 76                            | Y               |
| 2           | 34         | M   | ΔF508                            | 29.1             | 53                            | Y               |
| 8           | 27         | M   | ΔF508                            | 21.9             | 51                            | Y               |
| 10          | 53         | F   | ΔF508                            | 21               | 44                            | Y               |
| 11          | 24         | F   | ΔF508                            | 22.3             | 65                            | N               |
| 12          | 38         | F   | ΔF508                            | 17.1             | 27                            | Y               |
| 13          | 29         | F   | ΔF508                            | 16.5             | 64                            | Y               |
| 16          | 22         | F   | F50Y8                            | 23.9             | 100                           | Y               |
| 17          | 21         | F   | ΔF508                            | 20.1             | 98                            | N               |
| 19          | 19         | F   | ΔF508                            | -                | 29                            | Y               |
| 20          | 23         | F   | ΔF508                            | 17.3             | 25                            | Y               |
| 21          | 31         | F   | ΔF508                            | 20.8             | 48                            | Y               |
| 26          | 37         | M   | ΔF508                            | 24.8             | 32                            | Y               |
| 27          | 20         | M   | ΔF508                            | -                | 77                            | Y               |
| 32          | 32         | M   | ΔF508                            | 18.8             | 40                            | Y               |
| 33          | 27         | M   | ΔF508                            | 21.9             | 60                            | Y               |
| 34          | 27         | M   | G551D                            | 2.06             | 50                            | Y               |
| 35          | 31         | M   | ΔF508                            | 20               | 20                            | Y               |
| 40          | 26         | F   | ΔF508                            | 21.7             | 62                            | Y               |
| 43          | 24         | F   | ΔF508                            | 34.4             | 93                            | Y               |
| 45          | 27         | M   | ΔF508                            | 21.9             | 69                            | Y               |
| 46          | 28         | M   | ΔF508                            | 27.1             | 95                            | N               |
| 47          | 28         | M   | ΔF508                            | 27.1             | 95                            | N               |
| 48          | 26         | F   | ΔF508                            | 24.5             | 63                            | Y               |
| 54          | 26         | F   | ΔF508                            | -                | 27                            | Y               |
| 55          | 20         | F   | ΔF508                            | 18.5             | 24                            | N               |
| 57          | 26         | F   | ΔF508                            | 23.1             | 25                            | Y               |
| 58          | 22         | M   | ΔF508                            | -                | 38                            | Y               |
| 59          | 37         | F   | ΔF508                            | 18               | 24                            | Y               |

|     |    |   |       |      |     |   |
|-----|----|---|-------|------|-----|---|
| 59  | 37 | F | ΔF508 | 18   | 60  | Y |
| 62  | 19 | M | ΔF508 | -    | -   | Y |
| 63  | 27 | M | ΔF508 | 24.3 | 32  | Y |
| 70  | 19 | F | ΔF508 | 20.2 | 70  | Y |
| 72  | 30 | M | ΔF508 | 25.2 | 69  | Y |
| 74  | 23 | M | ΔF508 | 23.4 | 87  | N |
| 75  | 23 | M | ΔF508 | 23.4 | 87  | N |
| 76  | 39 | M | ΔF508 | 19   | 33  | - |
| 78  | 24 | F | ΔF508 | 19   | 49  | Y |
| 79  | 38 | F | G551D | 20.4 | 82  | Y |
| 80  | 23 | F | ΔF508 | 18   | 41  | Y |
| 80  | 23 | F | ΔF508 | 18   | 41  | Y |
| 83  | 43 | F | ΔF508 | 17.9 | 24  | N |
| 84  | 29 | F | ΔF508 | 22.5 | 47  | Y |
| 85  | 32 | M | ΔF508 | 20.7 | 54  | N |
| 89  | 25 | M | ΔF508 | 18   | 63  | Y |
| 92  | 27 | M | ΔF508 | 19.7 | 67  | Y |
| 93  | 25 | M | G551D | 24   | 84  | N |
| 97  | 23 | F | ΔF508 | 19   | 23  | Y |
| 99  | 26 | M | ΔF508 | 19.1 | 27  | Y |
| 27  |    | F | ΔF508 | 23.1 | 61  | Y |
| 101 | 37 | M | ΔF508 | 23   | 70  | Y |
| 102 | 28 | F | ΔF508 | 19.5 | 54  | Y |
| 103 | 29 | F | ΔF508 | 20.5 | 70  | - |
| 104 | 31 | M | ΔF508 | 21   | 85  | N |
| 105 | 30 | M | ΔF508 | 21   | 44  | Y |
| 106 | 26 | F | ΔF508 | 21.4 | 84  | Y |
| 107 | 21 | M | ΔF508 | 22   | 97  | Y |
| 110 | 40 | M | ΔF508 | 23   | 37  | Y |
| 111 | 28 | F | ΔF508 | 19.5 | 62  | N |
| 113 | 26 | M | ΔF508 | 24.3 | 55  | Y |
| 119 | 30 | M | ΔF508 | 18.4 | 61  | Y |
| 121 | 20 | F | ΔF508 | 20.4 | 64  | - |
| 123 | 25 | F | F5Y08 | 18.5 | 100 | Y |
| 124 | 28 | M | R560T | 26.4 | 48  | Y |

|     |    |   |        |      |    |   |
|-----|----|---|--------|------|----|---|
| 126 | 22 | F | ΔF508  | 15.8 | 30 | N |
| 128 | 28 | M | ΔF508  | 24   | 29 | Y |
| 129 | 26 | M | ΔF508  | 20   | 48 | Y |
| 129 | 26 | M | ΔF508  | 20   | 48 | Y |
| 130 | 30 | F | ΔF508  | 21.4 | 84 | N |
| 131 | 27 | M | Non-CF | 23.8 | 69 | N |
| 132 | 38 | M | Non-CF | -    | 36 | Y |
| 133 | 25 | F | Non-CF | -    | 77 | - |
| 134 | 57 | F | Non-CF | -    | 55 | - |
| 135 | 53 | F | ΔF508  | 21   | 44 | Y |
| 136 | 30 | M | Non-CF | 19.4 | 49 | Y |

---

a. Type of mutation detected in the CFTR, cystic fibrosis transmembrane conductance regulator;

b. BMI, body mass index;

c. FEV1, forced expiratory volume;

d. Patient is undergoing azithromycin (AZ) treatment where “Y” corresponds to Yes and N corresponds to “No”.
