# Supplementary material for: Microbiota and Metabolite Profiling Reveal Specific Alterations in Bacterial Community Structure and Environment in the Cystic Fibrosis Airway during Exacerbation
Source: PubMed Central journal article supplement (PMC3866110; doi:10.1371/journal.pone.0082432), 2013-12-17
Supplement: pone.0082432.s007.pdf [file pone.0082432.s007.pdf]

**Table S2.** Sampling depth and biodiversity found by barcoded 454 sequencing of sputum samples from “stable”, “exacerbated” and “control” patient cohorts

| <b>Sampling depth</b>             | <b>Average from stable CF samples</b> | <b>Average from exacerbated CF samples</b> | <b>Average from non-CF samples</b> |
|-----------------------------------|---------------------------------------|--------------------------------------------|------------------------------------|
| <b>Total sequences</b>            | 60,500                                | 65,000                                     | 71,000                             |
| <b>High quality pyrosequences</b> | 49,000                                | 50,000                                     | 51,000                             |
| <b>Unique sequences (100% ID)</b> | 1,600                                 | 1,550                                      | 1,700                              |
| <b>OTU (98% ID)</b>               | 400                                   | 450                                        | 450                                |
| <b>Genera</b>                     | 25-35                                 | 15-20                                      | 20-28                              |
