# Supplementary material for: Microbiota and Metabolite Profiling Reveal Specific Alterations in Bacterial Community Structure and Environment in the Cystic Fibrosis Airway during Exacerbation
Source: PubMed Central journal article supplement (PMC3866110; doi:10.1371/journal.pone.0082432), 2013-12-17
Supplement: pone.0082432.s008.pdf [file pone.0082432.s008.pdf]

**Table S3.** Microorganisms recovered from sputum taken from three patient cohorts included in the study.

| Sample designation <sup>a</sup> | Age (years) | Sex | Known CFTR mutation <sup>b</sup> | BMI <sup>c</sup> | FEV <sub>1</sub> <sup>d</sup> | Treatment with AZ <sup>e</sup> | Culture Data (Day of sample) <sup>f</sup> |
|---------------------------------|-------------|-----|----------------------------------|------------------|-------------------------------|--------------------------------|-------------------------------------------|
| E9                              | 31          | M   | ΔF508                            | 20               | 20                            | Y                              | BCC                                       |
| E11                             | 19          | F   | ΔF508                            | -                | 29                            | N                              | NA                                        |
| E22                             | 30          | M   | ΔF508                            | 21               | 44                            | Y                              | PA                                        |
| E23                             | 26          | F   | ΔF508                            | -                | 27                            | Y                              | PA                                        |
| E35                             | 23          | F   | ΔF508                            | 19               | 23                            | Y                              | PA                                        |
| E37                             | 26          | F   | ΔF508                            | 23.1             | 25                            | Y                              | PA, CAN                                   |
| E39                             | 28          | F   | ΔF508                            | 19.5             | 54                            | Y                              | NA                                        |
| E40                             | 19          | F   | ΔF508                            | -                | 29                            | N                              | PA                                        |
| E44                             | 27          | F   | ΔF508                            | 23.1             | 61                            | Y                              | PA                                        |
| E61                             | 26          | F   | ΔF508                            | 23.1             | 25                            | Y                              | NRF                                       |
| E62                             | 26          | F   | ΔF508                            | -                | 27                            | Y                              | PA                                        |
| E72                             | 32          | M   | ΔF508                            | 20.7             | 54                            | N                              | MSSA, PA                                  |
| E74                             | 25          | M   | G551D                            | 24               | 84                            | N                              | NA                                        |
| E76                             | 34          | M   | ΔF508                            | 29.1             | 53                            | Y                              | PA, MRSA                                  |
| E77                             | 27          | M   | G551D                            | 2.06             | 50                            | Y                              | MSSA                                      |
| EB9                             | 27          | M   | ΔF508                            | 24.3             | 32                            | Y                              | MSSA, CAN, ASP                            |
| E101                            | 25          | M   | ΔF508                            | 18               | 63                            | Y                              | PA                                        |
| E104                            | 37          | F   | ΔF508                            | 18               | 24                            | Y                              | PA, CAN                                   |
| E105                            | 30          | M   | ΔF508                            | 18.4             | 61                            | Y                              | PA                                        |
| E108                            | 27          | F   | ΔF508                            | 18.4             | 52                            | Y                              | NA                                        |
| E109                            | 26          | F   | ΔF508                            | 21.4             | 84                            | Y                              | PA, MSSA                                  |
| E113                            | 29          | F   | ΔF508                            | 20.5             | 70                            | N                              | PA,                                       |
| E116                            | 19          | M   | ΔF508                            | -                | -                             | Y                              | NA                                        |
| E118                            | 25          | F   | F5Y08                            | 18.5             | 100                           | Y                              | PA                                        |
| E123                            | 22          | F   | F5OY8                            | 23.9             | 100                           | Y                              | MRSA                                      |
| E124                            | 28          | M   | ΔF508                            | 24               | 29                            | Y                              | NA                                        |
| S1                              | 28          | F   | G551D                            | 22.1             | 41                            | Y                              | CAN, MRSA                                 |
| S2                              | 20          | M   | ΔF508                            | -                | 77                            | Y                              | MSSA, SA                                  |
| S3                              | 28          | M   | R560T                            | 26.4             | 48                            | Y                              | PA                                        |
| S4                              | 27          | M   | ΔF508                            | 19.7             | 67                            | Y                              | PA                                        |
| S5                              | 53          | F   | ΔF508                            | 21               | 44                            | Y                              | NPC                                       |
| S6                              | 23          | M   | ΔF508                            | 23.4             | 87                            | N                              | MSSA                                      |
| S7                              | 24          | F   | ΔF508                            | 34.4             | 93                            | Y                              | MRSA                                      |
| S8                              | 24          | F   | ΔF508                            | 19               | 49                            | Y                              | PA                                        |
| S10                             | 27          | F   | ΔF508                            | 18.4             | 61                            | Y                              | PA                                        |
| S13                             | 38          | F   | G551D                            | 20.4             | 82                            | Y                              | PA                                        |
| S14                             | 21          | M   | ΔF508                            | 22               | 97                            | Y                              | NA                                        |
| S15                             | 21          | M   | ΔF508                            | 22               | 97                            | Y                              | PA                                        |
| S16                             | 27          | M   | ΔF508                            | 21.9             | 60                            | Y                              | CAN                                       |
| S17                             | 32          | M   | ΔF508                            | 18.8             | 40                            | Y                              | PA, MSSA                                  |

|     |    |   |       |      |    |   |                   |
|-----|----|---|-------|------|----|---|-------------------|
| S18 | 43 | F | ΔF508 | 17.9 | 24 | N | PA                |
| S19 | 20 | F | ΔF508 | 18.5 | 24 | N | RP                |
| S20 | 23 | F | ΔF508 | 18   | 41 | Y | NA                |
| S21 | 31 | M | ΔF508 | 21   | 85 | N | MSSA              |
| S24 | 39 | M | ΔF508 | 19   | 33 | N | NA                |
| S25 | 27 | M | ΔF508 | 21.9 | 60 | Y | CAN               |
| S26 | 38 | F | ΔF508 | 17.1 | 27 | Y | PA                |
| S27 | 32 | M | ΔF508 | 18.8 | 40 | Y | PA, MSSA          |
| S28 | 23 | F | ΔF508 | 17.3 | 25 | Y | PA                |
| S32 | 26 | M | ΔF508 | 24.3 | 55 | Y | MRSA, PA          |
| S33 | 26 | F | ΔF508 | 21.4 | 52 | Y | PA, MSSA          |
| S34 | 19 | M | ΔF508 | 18   | 70 | Y | PA, CAN           |
| S38 | 30 | F | ΔF508 | 21.4 | 84 | N | PA                |
| S41 | 28 | M | ΔF508 | 27.1 | 95 | N | MSSA, PA          |
| S42 | 27 | M | ΔF508 | 21.9 | 69 | Y | PA, CAN           |
| S43 | 26 | F | ΔF508 | 23.1 | 25 | Y | SM, CAN           |
| S45 | 29 | F | ΔF508 | 22.5 | 47 | Y | PA                |
| S46 | 20 | F | ΔF508 | -    | 76 | Y | PA, MSSA, CAN     |
| S47 | 20 | M | ΔF508 | -    | 77 | Y | CAN               |
| S48 | 28 | F | ΔF508 | 19.5 | 54 | Y | PA                |
| S49 | 26 | M | ΔF508 | 24.3 | 55 | Y | MRSA, PA, CAN     |
| S50 | 20 | F | ΔF508 | 20.4 | 64 | Y | PA, CAN, MC       |
| S51 | 38 | F | ΔF508 | 17.1 | 27 | Y | PA                |
| S54 | 26 | M | ΔF508 | 20   | 48 | Y | PA                |
| S58 | 28 | F | ΔF508 | 19.5 | 62 | N | NA                |
| S59 | 28 | M | ΔF508 | 27.1 | 95 | N | SA, ST            |
| S60 | 37 | M | ΔF508 | 24.8 | 32 | Y | NRF               |
| S63 | 26 | F | ΔF508 | 24.5 | 63 | Y | PA                |
| S64 | 40 | M | ΔF508 | 23   | 37 | Y | PA, PF, MRSA      |
| S65 | 27 | M | ΔF508 | 21.9 | 69 | Y | NA                |
| S66 | 28 | F | ΔF508 | 19.5 | 62 | N | PA, COLIFORM, CAN |
| S68 | 24 | F | ΔF508 | 22.3 | 65 | N | MSSA, MC, HP      |
| S69 | 27 | M | G551D | 20.6 | 50 | Y | NA                |
| S70 | 22 | F | ΔF508 | 15.8 | 30 | N | MSSA, PA, STP     |
| S71 | 21 | M | ΔF508 | 22   | 97 | Y | PA                |
| S73 | 21 | F | ΔF508 | 20.1 | 98 | N | PA                |
| S75 | 25 | F | ΔF508 | 18.5 | 54 | Y | NA                |
| S78 | 30 | M | ΔF508 | 25.2 | 69 | Y | PA, CAN           |
| S80 | 37 | M | ΔF508 | 23   | 70 | Y | PA, MSSA          |
| S82 | 29 | F | ΔF508 | 16.5 | 64 | Y | NA                |
| S84 | 23 | F | ΔF508 | 18   | 41 | Y | PA                |
| S85 | 26 | F | ΔF508 | 21.7 | 62 | Y | PA, MSSA          |

|       |    |   |       |      |    |   |               |
|-------|----|---|-------|------|----|---|---------------|
| S89   | 34 | M | ΔF508 | 24.3 | 32 | Y | PA            |
| S90   | 31 | F | ΔF508 | 20.8 | 48 | Y | PA            |
| S95   | 53 | F | ΔF508 | 21   | 44 | Y | CAN, NRF      |
| S102  | 26 | M | ΔF508 | 20   | 48 | Y | PA            |
| S103  | 19 | F | ΔF508 | 20.2 | 70 | Y | NRF           |
| S106  | 37 | F | ΔF508 | 18   | 60 | Y | PA, ASP       |
| S107  | 22 | M | ΔF508 | -    | 38 | N | BCC           |
| S110  | 23 | M | ΔF508 | 23.4 | 87 | N | PA, CAN       |
| S111  | 26 | M | ΔF508 | 19.1 | 27 | Y | PA, MSSA      |
| S112  | 20 | F | ΔF508 | 20.4 | 64 | N | PA            |
| S114  | 32 | M | ΔF508 | 18.8 | 40 | Y | PA, MSSA, ASP |
| S117  | 26 | F | ΔF508 | 21.4 | 52 | Y | PA, CAN       |
| S119  | 28 | M | RS60T | 26.4 | 48 | Y | NA            |
| S120  | 37 | M | ΔF508 | 24.8 | 32 | Y | PA            |
| S126  | 38 | F | ΔF508 | 17.1 | 27 | Y | PA            |
| S127  | 37 | F | ΔF508 | 18   | 60 | Y | PA            |
| S128  | 27 | M | ΔF508 | 21.9 | 51 | Y | PA, MSSA, SP  |
| NCF91 | 27 | M | -     | 23.8 | 69 | N | NRF           |
| NCF92 | 38 | M | -     | -    | 36 | Y | HP            |
| NCF93 | 25 | F | -     | -    | 77 | N | NPC           |
| NCF94 | 57 | F | -     | -    | 55 | N | NPC           |
| NCF96 | 30 | M | -     | 19.4 | 49 | Y | NPC           |

a. Description of sputum sample taken from patient cohorts where "E" corresponds to exacerbated cohort; "S" corresponds to stable cohort and "NCF" corresponds to non-CF cohort.

b. Type of mutation detected in the CFTR, cystic fibrosis transmembrane conductance regulator;

c. BMI, body mass index;

d. FEV1, forced expiratory volume;

e. Patient is undergoing azithromycin (AZ) treatment where "Y" corresponds to Yes and N corresponds to "No".

f. Abbreviations of microorganisms identified by culture-based methods: CAN-*Candida* species, SA-*Staphylococcus aureus*, PA-*Pseudomonas aeruginosa*, ST-*Stenotrophomonas* species, ASP-*Aspergillus* species, STP-*Streptococcus* species, BCC-*Burkholderia* species, SP-*Sphingomonas* species, MSSA-Methicillin Sensitive *Staphylococcus aureus*, MRSA- Methicillin Resistant *Staphylococcus aureus*, RP- *Ralstonia pickettii*, MC- *Moraxella catarrhalis*, SA- *Staphylococcus aureus*, Sp - *Streptococcus pneumoniae*, Pf - *Pseudomonas fluorescens*, Hp-*Haemophilus parainfluenzae*, SM-*Stenotrophomonas maltophilia*, NPC-No pathogens cultured, NA- Not assessed.
