# Supplementary material for: Microbiota and Metabolite Profiling Reveal Specific Alterations in Bacterial Community Structure and Environment in the Cystic Fibrosis Airway during Exacerbation
Source: PubMed Central journal article supplement (PMC3866110; doi:10.1371/journal.pone.0082432), 2013-12-17
Supplement: pone.0082432.s009.pdf [file pone.0082432.s009.pdf]

**Table S4.** Concentrations of metabolites identified in CF sputum taken from 26 stable CF patients. Data are given as the average values measured in triplicate (metabolite concentrations are described as  $\mu\text{M}$  unless otherwise stated and means  $\pm$  standard deviations are reported).

| Metabolite                | S1                   | S2                         | S3     | S4     | S5     | S6     | S7     | S8     | S9     | S10    | S11    | S12    | S13    | S14    | S15    | S16    | S17    | S18    | S19    | S20    | S21    | S22    | S23    | S24    | S25    |        |       |      |
|---------------------------|----------------------|----------------------------|--------|--------|--------|--------|--------|--------|--------|--------|--------|--------|--------|--------|--------|--------|--------|--------|--------|--------|--------|--------|--------|--------|--------|--------|-------|------|
| Amino acids               | alanine              | 2500.0                     | 2510.0 | 2555.0 | 2589.0 | 2572.0 | 2589.0 | 2549.0 | 2533.0 | 2554.0 | 2579.0 | 2577.0 | 2588.0 | 2555.0 | 2577.0 | 2599.0 | 2599.0 | 2545.0 | 2533.0 | 2500.0 | 2570.0 | 2513.0 | 2595.0 | 2955.0 | 2600.0 | 2400.0 |       |      |
|                           | aspartate            | 64.7                       | 63.9   | 64.1   | 65.4   | 64.6   | 66.0   | 65.4   | 64.5   | 64.4   | 65.1   | 64.7   | 65.8   | 64.4   | 64.4   | 65.0   | 66.4   | 65.3   | 65.9   | 63.2   | 66.5   | 62.9   | 57.1   | 73.9   | 70.4   | 53.8   |       |      |
|                           | cysteine             | 20.3                       | 19.9   | 19.6   | 20.3   | 19.6   | 20.2   | 20.3   | 20.0   | 19.8   | 20.1   | 19.7   | 20.4   | 20.0   | 19.8   | 19.6   | 20.3   | 19.8   | 20.8   | 19.0   | 21.1   | 22.1   | 15.5   | 21.0   | 26.2   | 16.6   |       |      |
|                           | glycine              | 75.4                       | 76.2   | 72.6   | 77.7   | 72.7   | 74.6   | 76.0   | 75.9   | 73.8   | 76.7   | 72.2   | 76.6   | 75.6   | 75.9   | 72.3   | 76.9   | 71.4   | 82.1   | 67.6   | 71.8   | 107.0  | 55.2   | 60.1   | 118.6  | 62.1   |       |      |
|                           | glutamate            | 114.4                      | 119.6  | 106.5  | 121.9  | 111.1  | 111.9  | 114.1  | 117.2  | 109.8  | 121.1  | 107.4  | 115.5  | 113.5  | 119.8  | 107.2  | 122.7  | 99.1   | 138.6  | 107.2  | 76.5   | 220.9  | 104.8  | 57.8   | 217.9  | 94.3   |       |      |
|                           | histidine            | 66.0                       | 77.5   | 60.3   | 75.7   | 68.5   | 67.7   | 67.2   | 73.7   | 62.5   | 77.8   | 64.1   | 70.2   | 65.4   | 77.2   | 60.2   | 85.4   | 49.3   | 89.2   | 96.7   | 23.9   | 145.5  | 125.1  | 18.3   | 159.4  | 57.1   |       |      |
|                           | lysine               | 127.6                      | 192.9  | 119.4  | 165.9  | 151.8  | 151.1  | 136.9  | 176.7  | 120.5  | 182.0  | 137.1  | 161.0  | 127.1  | 192.1  | 105.8  | 259.7  | 83.0   | 138.3  | 607.2  | 24.6   | 174.4  | 1026.2 | 17.2   | 418.6  | 124.1  |       |      |
|                           | phenylalanine        | 26.5                       | 64.6   | 28.8   | 43.7   | 40.2   | 44.2   | 31.0   | 58.6   | 26.5   | 53.1   | 34.0   | 50.7   | 26.5   | 72.6   | 16.3   | 125.2  | 24.0   | 9.1    | 986.0  | 5.6    | 6.8    | 2384.0 | 1.6    | 134.9  | 33.1   |       |      |
|                           | tyrosine             | 49.8                       | 49.1   | 49.3   | 50.3   | 49.7   | 50.8   | 50.3   | 49.6   | 49.5   | 50.0   | 49.8   | 50.6   | 49.6   | 49.6   | 50.0   | 51.1   | 50.2   | 50.7   | 48.6   | 51.1   | 48.4   | 43.9   | 56.8   | 54.2   | 41.4   |       |      |
|                           | tryptophan           | 34.5                       | 33.8   | 33.3   | 34.5   | 33.3   | 34.3   | 34.5   | 34.1   | 33.6   | 34.2   | 33.4   | 34.7   | 34.0   | 33.7   | 33.3   | 34.6   | 33.7   | 35.4   | 32.3   | 35.9   | 37.5   | 26.3   | 35.7   | 44.5   | 28.1   |       |      |
|                           | arginine             | 91.7                       | 91.4   | 87.1   | 93.2   | 87.2   | 89.5   | 91.2   | 91.1   | 88.6   | 92.0   | 86.6   | 92.0   | 86.6   | 92.0   | 90.8   | 91.1   | 86.7   | 92.2   | 85.7   | 98.6   | 81.1   | 86.2   | 128.4  | 66.3   | 72.1   | 142.4 | 74.5 |
|                           | proline              | 150.5                      | 157.4  | 140.1  | 160.4  | 146.1  | 147.3  | 150.2  | 154.2  | 144.5  | 159.4  | 141.3  | 152.0  | 149.4  | 157.7  | 141.0  | 161.5  | 130.4  | 182.4  | 141.1  | 100.7  | 290.7  | 137.8  | 76.0   | 286.7  | 124.1  |       |      |
|                           | valine               | 1244.5                     | 1463.0 | 1137.5 | 1428.8 | 1291.9 | 1277.0 | 1268.0 | 1389.8 | 1180.1 | 1468.9 | 1210.3 | 1324.5 | 1233.8 | 1455.8 | 1136.8 | 1612.1 | 931.1  | 1683.0 | 1824.9 | 450.9  | 2745.5 | 2361.4 | 345.2  | 3006.9 | 1077.5 |       |      |
|                           | Polyamines           | putrescine                 | 21.0   | 17.9   | 23.0   | 18.3   | 20.2   | 20.5   | 20.6   | 18.8   | 22.1   | 17.8   | 21.6   | 19.7   | 21.2   | 18.0   | 23.0   | 16.2   | 28.1   | 15.5   | 14.3   | 58.0   | 9.5    | 11.1   | 75.7   | 8.7    | 24.3  |      |
|                           |                      | spermine                   | 10.0   | 9.8    | 9.9    | 10.1   | 9.9    | 10.2   | 10.1   | 9.9    | 9.9    | 10.0   | 10.0   | 10.1   | 9.9    | 9.9    | 10.0   | 10.2   | 10.0   | 10.1   | 9.7    | 10.2   | 9.7    | 8.8    | 11.4   | 10.8   | 8.3   |      |
| spermidine                |                      | 8.1                        | 8.0    | 7.8    | 8.1    | 7.8    | 8.1    | 8.1    | 8.0    | 7.9    | 8.0    | 7.9    | 8.2    | 8.0    | 7.9    | 7.8    | 8.1    | 7.9    | 8.3    | 7.6    | 8.4    | 8.8    | 6.2    | 8.4    | 10.5   | 6.6    |       |      |
| Carbohydrate              | fructose             | 81.5                       | 81.2   | 77.4   | 82.9   | 77.5   | 79.6   | 81.1   | 81.0   | 78.8   | 81.8   | 77.0   | 81.7   | 80.7   | 81.0   | 77.1   | 82.0   | 76.2   | 87.6   | 72.1   | 76.6   | 114.2  | 58.9   | 64.1   | 126.5  | 66.2   |       |      |
|                           | fructose-6-phosphate | 90.3                       | 94.4   | 84.1   | 96.2   | 87.7   | 88.4   | 90.1   | 92.5   | 86.7   | 95.6   | 84.8   | 91.2   | 89.6   | 94.6   | 84.6   | 96.9   | 78.3   | 109.4  | 84.6   | 60.4   | 174.4  | 82.7   | 45.6   | 172.0  | 74.5   |       |      |
|                           | glucose              | 99.4                       | 116.9  | 90.9   | 114.1  | 103.2  | 102.0  | 101.3  | 111.0  | 94.3   | 117.3  | 96.7   | 105.8  | 98.5   | 116.3  | 90.8   | 128.8  | 74.4   | 134.4  | 145.8  | 36.0   | 219.3  | 188.6  | 27.6   | 240.2  | 86.1   |       |      |
|                           | pyruvate             | 11.1                       | 11.1   | 10.9   | 10.7   | 10.8   | 10.7   | 10.9   | 11.0   | 10.9   | 10.8   | 10.7   | 10.9   | 10.8   | 10.7   | 10.9   | 11.0   | 11.1   | 10.8   | 11.0   | 10.7   | 9.4    | 10.7   | 11.6   | 11.6   |        |       |      |
|                           | lactate              | 26.1                       | 26.5   | 26.3   | 25.8   | 26.2   | 25.6   | 25.8   | 26.2   | 26.3   | 26.0   | 26.1   | 25.7   | 26.2   | 26.2   | 26.0   | 25.5   | 25.9   | 25.7   | 26.7   | 25.4   | 26.8   | 29.6   | 22.9   | 24.0   | 31.4   |       |      |
|                           | maltose              | 89.6                       | 88.4   | 88.8   | 90.6   | 89.4   | 91.4   | 90.6   | 89.3   | 89.1   | 90.1   | 89.6   | 91.2   | 89.2   | 89.2   | 90.0   | 91.9   | 90.4   | 91.2   | 87.5   | 92.0   | 87.2   | 79.0   | 102.3  | 97.5   | 74.5   |       |      |
|                           | maltotetraose        | 71.0                       | 69.7   | 68.6   | 70.9   | 68.5   | 70.7   | 71.0   | 70.1   | 69.3   | 70.4   | 68.8   | 71.5   | 70.0   | 69.4   | 68.5   | 71.1   | 69.4   | 72.9   | 66.6   | 73.9   | 77.2   | 54.1   | 73.4   | 91.6   | 57.9   |       |      |
|                           | maltotriose          | 49.8                       | 49.1   | 49.3   | 50.3   | 49.7   | 50.8   | 50.3   | 49.6   | 49.5   | 50.0   | 49.8   | 50.6   | 49.6   | 49.6   | 50.0   | 51.1   | 50.2   | 50.7   | 48.6   | 51.1   | 48.4   | 43.9   | 56.8   | 54.2   | 41.4   |       |      |
|                           | glycerol             | 5.1                        | 5.0    | 4.9    | 5.1    | 4.9    | 5.0    | 5.1    | 5.0    | 4.9    | 5.0    | 4.9    | 5.1    | 5.0    | 5.0    | 4.9    | 5.1    | 5.0    | 5.2    | 4.8    | 5.3    | 5.5    | 3.9    | 5.2    | 6.5    | 4.1    |       |      |
|                           | Lipid                | glycerol 3-phosphate (G3P) | 5.0    | 4.9    | 4.9    | 5.0    | 5.0    | 5.1    | 5.0    | 5.0    | 5.0    | 5.0    | 5.0    | 5.1    | 5.0    | 5.0    | 5.0    | 5.1    | 5.0    | 5.1    | 4.9    | 5.1    | 4.8    | 4.4    | 5.7    | 5.4    | 4.1   |      |
| cholesterol               |                      | 4.1                        | 4.0    | 3.9    | 4.1    | 3.9    | 4.0    | 4.1    | 4.0    | 4.0    | 4.0    | 3.9    | 4.1    | 4.0    | 4.0    | 3.9    | 4.1    | 4.0    | 4.2    | 3.8    | 4.2    | 4.4    | 3.1    | 4.2    | 5.2    | 3.3    |       |      |
| 7-beta-hydroxycholesterol |                      | 32.9                       | 32.4   | 32.6   | 33.2   | 32.8   | 33.5   | 33.2   | 32.7   | 32.7   | 33.0   | 32.9   | 33.4   | 32.7   | 32.7   | 33.0   | 33.7   | 33.2   | 33.4   | 32.1   | 33.7   | 32.0   | 29.0   | 37.5   | 35.8   | 27.3   |       |      |
| lathosterol               |                      | 22.9                       | 22.6   | 22.7   | 23.2   | 22.8   | 23.4   | 23.1   | 22.8   | 22.8   | 23.0   | 22.9   | 23.3   | 22.8   | 22.8   | 23.0   | 23.5   | 23.1   | 23.3   | 22.4   | 23.5   | 22.3   | 20.2   | 26.1   | 24.9   | 19.0   |       |      |
| oleate (18:1n9)           |                      | 13.9                       | 13.8   | 13.8   | 14.1   | 13.9   | 14.2   | 14.1   | 13.9   | 13.9   | 14.0   | 13.9   | 14.2   | 13.9   | 13.9   | 14.0   | 14.3   | 14.1   | 14.2   | 13.6   | 14.3   | 13.6   | 12.3   | 15.9   | 15.2   | 11.6   |       |      |
| palmitate (16:0)          |                      | 35.0                       | 45.0   | 40.0   | 27.0   | 40.0   | 56.0   | 40.0   | 35.0   | 29.0   | 61.0   | 23.0   | 34.0   | 45.0   | 45.0   | 35.0   | 39.0   | 41.0   | 40.0   | 47.0   | 32.0   | 60.0   | 61.0   | 34.0   | 42.0   | 37.0   |       |      |
| caproate (6:0)            |                      | 117.5                      | 119.5  | 118.7  | 119.5  | 117.6  | 116.9  | 117.9  | 119.0  | 118.9  | 119.4  | 117.9  | 118.9  | 120.0  | 120.0  | 117.5  | 116.9  | 115.4  | 118.6  | 116.0  | 119.8  | 136.4  | 120.0  | 110.8  | 133.8  | 133.8  |       |      |
| heptanoate (7:0)          |                      | 7.0                        | 6.9    | 6.9    | 7.0    | 7.0    | 7.1    | 7.0    | 6.9    | 6.9    | 7.0    | 7.0    | 7.1    | 6.9    | 6.9    | 7.0    | 7.1    | 7.0    | 7.1    | 6.8    | 7.2    | 6.8    | 6.1    | 8.0    | 7.6    | 5.8    |       |      |
| Nucleotide                |                      | inosine                    | 6.0    | 5.9    | 5.9    | 6.0    | 6.0    | 6.1    | 6.0    | 6.0    | 5.9    | 6.0    | 6.0    | 6.1    | 5.9    | 6.0    | 6.1    | 6.0    | 6.1    | 5.8    | 6.1    | 5.8    | 5.3    | 6.8    | 6.5    | 5.0    |       |      |
|                           |                      | adenosine                  | 4.0    | 3.9    | 3.9    | 4.0    | 4.0    | 4.1    | 4.0    | 4.0    | 4.0    | 4.0    | 4.0    | 4.1    | 4.0    | 4.0    | 4.0    | 4.1    | 4.0    | 4.1    | 3.9    | 4.1    | 3.9    | 3.5    | 4.5    | 4.3    | 3.3   |      |
|                           | guanosine            | 30.9                       | 30.5   | 30.6   | 31.2   | 30.8   | 31.5   | 31.2   | 30.7   | 30.7   | 31.0   | 30.9   | 31.4   | 30.7   | 30.7   | 31.0   | 31.7   | 31.1   | 31.4   | 30.2   | 31.7   | 30.0   | 27.2   | 35.2   | 33.6   | 25.7   |       |      |
|                           | cytidine             | 25.9                       | 25.5   | 25.7   | 26.2   | 25.8   | 26.4   | 26.2   | 25.8   | 25.7   | 26.0   | 25.9   | 26.3   | 25.8   | 25.8   | 26.0   | 26.6   | 26.1   | 26.3   | 25.3   | 26.6   | 25.2   | 22.8   | 29.6   | 28.2   | 21.5   |       |      |
