# Supplementary material for: Microbiota and Metabolite Profiling Reveal Specific Alterations in Bacterial Community Structure and Environment in the Cystic Fibrosis Airway during Exacerbation
Source: PLoS One. 2013 Dec 17;8(12):e82432. doi: 10.1371/journal.pone.0082432 (PMC3866110; doi:10.1371/journal.pone.0082432)
Supplement: Table S5 — Concentrations of metabolites identified in CF sputum taken from 26 CF patients presenting with exacerbation. Data are given as the average values measured in triplicate (metabolite concentrations are described as µM unless otherwise stated and means ± standard deviations are reported). (PDF) [file pone.0082432.s010.pdf]

**Table S5.** Concentrations of metabolites identified in CF sputum taken from 26 CF patients presenting with exacerbation. Data are given as the average values measured in triplicate (metabolite concentrations are described as  $\mu\text{M}$  unless otherwise stated).

| Metabolite       | E1                         | E2         | E3   | E4   | E5   | E6   | E7   | E8   | E9   | E10  | E11  | E12  | E13  | E14  | E15  | E16  | E17  | E18  | E19  | E20  | E21  | E22  | E23  | E24  | E25  | E26  |      |     |
|------------------|----------------------------|------------|------|------|------|------|------|------|------|------|------|------|------|------|------|------|------|------|------|------|------|------|------|------|------|------|------|-----|
| Amino acids      | alanine                    | 2500       | 2500 | 2510 | 2555 | 2589 | 2572 | 2589 | 2549 | 2533 | 2554 | 2579 | 2577 | 2588 | 2555 | 2577 | 2599 | 2599 | 2545 | 2533 | 2500 | 2570 | 2513 | 2595 | 2955 | 2600 | 2400 |     |
|                  | aspartate                  | 65         | 65   | 64   | 64   | 65   | 65   | 66   | 65   | 64   | 64   | 65   | 65   | 66   | 64   | 64   | 65   | 66   | 65   | 66   | 63   | 66   | 63   | 57   | 74   | 70   | 54   |     |
|                  | cysteine                   | 20         | 20   | 20   | 20   | 20   | 20   | 20   | 20   | 20   | 20   | 20   | 20   | 20   | 20   | 20   | 20   | 20   | 20   | 21   | 19   | 21   | 22   | 15   | 21   | 26   | 17   |     |
|                  | glycine                    | 75         | 76   | 76   | 73   | 78   | 73   | 75   | 76   | 76   | 74   | 77   | 72   | 77   | 77   | 76   | 76   | 72   | 77   | 71   | 82   | 68   | 72   | 107  | 55   | 60   | 119  | 62  |
|                  | glutamate                  | 114        | 114  | 120  | 106  | 122  | 111  | 112  | 114  | 117  | 110  | 121  | 107  | 115  | 114  | 120  | 107  | 123  | 99   | 139  | 107  | 76   | 221  | 105  | 58   | 218  | 94   |     |
|                  | histidine                  | 69         | 66   | 78   | 60   | 76   | 68   | 68   | 67   | 74   | 63   | 78   | 64   | 70   | 65   | 77   | 60   | 85   | 49   | 89   | 97   | 24   | 145  | 125  | 18   | 159  | 57   |     |
|                  | lysine                     | 150        | 128  | 193  | 119  | 166  | 152  | 151  | 137  | 177  | 121  | 182  | 137  | 161  | 127  | 192  | 106  | 260  | 83   | 138  | 607  | 25   | 174  | 1026 | 17   | 419  | 124  |     |
|                  | phenylalanine              | 40         | 26   | 65   | 29   | 44   | 40   | 44   | 31   | 59   | 26   | 53   | 34   | 51   | 26   | 73   | 16   | 125  | 24   | 9    | 986  | 6    | 7    | 2384 | 2    | 135  | 33   |     |
|                  | tyrosine                   | 50         | 50   | 50   | 49   | 50   | 50   | 51   | 50   | 50   | 50   | 50   | 50   | 51   | 50   | 50   | 50   | 50   | 51   | 49   | 51   | 48   | 44   | 57   | 54   | 31   | 41   |     |
|                  | tryptophan                 | 34         | 34   | 34   | 33   | 34   | 34   | 34   | 34   | 34   | 34   | 34   | 33   | 35   | 34   | 34   | 35   | 33   | 35   | 34   | 35   | 32   | 36   | 25   | 36   | 45   | 28   |     |
|                  | arginine                   | 90         | 92   | 91   | 87   | 93   | 87   | 90   | 91   | 91   | 89   | 92   | 87   | 92   | 91   | 91   | 87   | 86   | 99   | 81   | 86   | 128  | 66   | 72   | 142  | 74   | 40   |     |
|                  | proline                    | 150        | 150  | 157  | 140  | 160  | 146  | 147  | 150  | 154  | 144  | 159  | 141  | 152  | 149  | 158  | 141  | 161  | 130  | 182  | 141  | 101  | 291  | 138  | 76   | 287  | 124  |     |
|                  | valine                     | 1302       | 1244 | 1463 | 1137 | 1429 | 1292 | 1277 | 1268 | 1390 | 1180 | 1469 | 1210 | 1324 | 1234 | 1456 | 1137 | 1612 | 931  | 1683 | 1825 | 451  | 2745 | 2361 | 345  | 3007 | 1078 |     |
|                  | Polyamines                 | putrescine | 104  | 103  | 165  | 155  | 110  | 109  | 108  | 165  | 123  | 98   | 45   | 108  | 87   | 129  | 149  | 105  | 105  | 121  | 89   | 110  | 165  | 150  | 112  | 111  | 104  | 103 |
|                  |                            | spermine   | 10   | 10   | 10   | 10   | 10   | 10   | 10   | 10   | 10   | 10   | 10   | 10   | 10   | 10   | 10   | 10   | 10   | 10   | 10   | 10   | 10   | 10   | 9    | 11   | 11   | 8   |
| spermidine       |                            | 8          | 8    | 8    | 8    | 8    | 8    | 8    | 8    | 8    | 8    | 8    | 8    | 8    | 8    | 8    | 8    | 8    | 8    | 8    | 8    | 8    | 9    | 6    | 8    | 10   | 7    |     |
| Carbohydrate     | fructose                   | 80         | 81   | 81   | 77   | 83   | 78   | 80   | 81   | 81   | 79   | 82   | 77   | 82   | 81   | 81   | 77   | 82   | 76   | 88   | 72   | 80   | 114  | 59   | 64   | 127  | 66   |     |
|                  | fructose-6-phosphate       | 90         | 90   | 94   | 84   | 96   | 88   | 88   | 90   | 93   | 87   | 96   | 85   | 91   | 90   | 95   | 85   | 97   | 78   | 109  | 85   | 90   | 174  | 83   | 46   | 172  | 74   |     |
|                  | glucose                    | 104        | 99   | 117  | 91   | 114  | 103  | 102  | 101  | 111  | 94   | 117  | 97   | 106  | 99   | 116  | 91   | 129  | 74   | 134  | 146  | 104  | 219  | 189  | 28   | 240  | 86   |     |
|                  | pyruvate                   | 250        | 255  | 310  | 410  | 267  | 255  | 245  | 295  | 395  | 235  | 250  | 239  | 240  | 396  | 410  | 235  | 250  | 241  | 244  | 264  | 355  | 500  | 235  | 264  | 335  | 254  |     |
|                  | lactate                    | 383        | 375  | 520  | 510  | 283  | 395  | 411  | 341  | 255  | 428  | 402  | 421  | 419  | 254  | 595  | 397  | 373  | 387  | 382  | 365  | 510  | 580  | 334  | 397  | 311  | 410  |     |
|                  | maltose                    | 90         | 90   | 88   | 89   | 91   | 89   | 89   | 91   | 91   | 89   | 89   | 90   | 91   | 89   | 89   | 90   | 92   | 90   | 90   | 88   | 92   | 87   | 79   | 102  | 98   | 74   |     |
|                  | maltotetraose              | 70         | 71   | 70   | 69   | 71   | 68   | 71   | 71   | 70   | 69   | 70   | 69   | 72   | 70   | 69   | 69   | 71   | 69   | 70   | 67   | 74   | 77   | 54   | 73   | 92   | 58   |     |
|                  | maltotriose                | 50         | 50   | 49   | 49   | 50   | 50   | 51   | 50   | 50   | 50   | 50   | 50   | 51   | 50   | 50   | 50   | 51   | 50   | 50   | 49   | 51   | 48   | 44   | 57   | 54   | 41   |     |
|                  | glycerol                   | 5          | 5    | 5    | 5    | 5    | 5    | 5    | 5    | 5    | 5    | 5    | 5    | 5    | 5    | 5    | 5    | 5    | 5    | 5    | 5    | 5    | 6    | 4    | 5    | 7    | 4    |     |
|                  | glycerol 3-phosphate (G3P) | 5          | 5    | 5    | 5    | 5    | 5    | 5    | 5    | 5    | 5    | 5    | 5    | 5    | 5    | 5    | 5    | 5    | 5    | 5    | 5    | 5    | 5    | 4    | 6    | 5    | 4    |     |
|                  | cholesterol                | 4          | 4    | 4    | 4    | 4    | 4    | 4    | 4    | 4    | 4    | 4    | 4    | 4    | 4    | 4    | 4    | 4    | 4    | 4    | 4    | 4    | 4    | 3    | 4    | 5    | 3    |     |
|                  | 7-beta-hydroxycholesterol  | 33         | 33   | 32   | 33   | 33   | 33   | 33   | 33   | 33   | 33   | 33   | 33   | 33   | 33   | 33   | 33   | 33   | 34   | 33   | 33   | 32   | 34   | 29   | 28   | 36   | 27   |     |
|                  | erol                       | 23         | 23   | 23   | 23   | 23   | 23   | 23   | 23   | 23   | 23   | 23   | 23   | 23   | 23   | 23   | 23   | 23   | 23   | 23   | 23   | 22   | 24   | 22   | 20   | 26   | 19   |     |
| lathosterol      | 14                         | 14         | 14   | 14   | 14   | 14   | 14   | 14   | 14   | 14   | 14   | 14   | 14   | 14   | 14   | 14   | 14   | 14   | 14   | 14   | 14   | 14   | 12   | 16   | 15   | 12   |      |     |
| cleate (18:1n9)  | 5                          | 3          | 5    | 9    | 6    | 4    | 11   | 2    | 4    | 2    | 9    | 11   | 7    | 8    | 4    | 4    | 3    | 4    | 5    | 0    | 1    | 7    | 3    | 4    | 5    | 5    |      |     |
| palmitate (16:0) | 3                          | 117        | 115  | 119  | 116  | 120  | 136  | 120  | 111  | 134  | 134  | 134  | 119  | 118  | 117  | 118  | 119  | 119  | 118  | 119  | 118  | 119  | 120  | 120  | 117  | 117  |      |     |
| caproate (6:0)   | 7                          | 7          | 7    | 7    | 7    | 7    | 7    | 7    | 6    | 8    | 8    | 6    | 7    | 7    | 7    | 7    | 7    | 7    | 7    | 7    | 7    | 7    | 7    | 7    | 7    | 7    |      |     |
| Nucleotide       | heptanoate (7:0)           | 6          | 6    | 6    | 6    | 6    | 6    | 6    | 5    | 7    | 7    | 6    | 5    | 6    | 6    | 6    | 6    | 6    | 6    | 6    | 6    | 6    | 6    | 6    | 6    | 6    |      |     |
|                  | inosine                    | 4          | 4    | 4    | 4    | 4    | 4    | 4    | 4    | 4    | 4    | 4    | 4    | 4    | 4    | 4    | 4    | 4    | 4    | 4    | 4    | 4    | 4    | 4    | 4    | 4    |      |     |
|                  | adenosine                  | 31         | 32   | 31   | 31   | 30   | 32   | 30   | 27   | 35   | 34   | 26   | 31   | 31   | 31   | 31   | 31   | 31   | 31   | 31   | 31   | 31   | 31   | 31   | 31   | 31   |      |     |
| guanosine        | 10                         | 27         | 26   | 26   | 25   | 27   | 25   | 23   | 30   | 28   | 22   | 26   | 26   | 26   | 26   | 26   | 26   | 26   | 26   | 26   | 26   | 26   | 26   | 26   | 26   | 26   |      |     |
|                  | cytidine                   | 10         | 27   | 26   | 26   | 25   | 27   | 25   | 23   | 30   | 28   | 22   | 26   | 26   | 26   | 26   | 26   | 26   | 26   | 26   | 26   | 26   | 26   | 26   | 26   | 26   |      |     |
